# Supplementary material for: Maintenance of age in human neurons generated by microRNA-based neuronal conversion of fibroblasts
Source: eLife journal article supplement (doi:10.7554/elife.18648), 2016-09-20
Supplement: supp [file elife-18648-supp-v1.zip]

Archive with 7 entries (7 files):
- elife_poa_e18648_Figure_3_figure_supplement_1.pdf
- elife_poa_e18648_Figure_2_source_data_1.xls
- elife_poa_e18648_Figure_4_source_data_1.xlsx
- elife_poa_e18648_Figure_3_figure_supplement_2.pdf
- elife_poa_e18648_Figure_3_source_data_1.xlsx
- elife_poa_e18648_Figure_3_source_data_2.xlsx
- elife_poa_e18648_Figure_1_figure_supplement_1.pdf
