# Supplementary material for: Maintenance of age in human neurons generated by microRNA-based neuronal conversion of fibroblasts
Source: eLife journal article supplement (doi:10.7554/elife.18648), 2016-09-20
Supplement: supp [file elife-18648-supp-v1.zip › elife_poa_e18648_Figure_2_source_data_1.xls]

## Sheet: datSampleNoobUpload (1).csv
SampleNo	DNAmAge	ExternalSampleID	Tissue	Age	Gender	TransformationStatus
SampleNo1	43.4307	17B-C	Fibroblasts	17	male	Untransformed
SampleNo2	47.0618	72-C	Fibroblasts	72	male	Untransformed
SampleNo3	36.1812	01-M	MSN	1	male	Lentiviral miR-9/9-124-CDM
SampleNo4	32.2913	01-C	Fibroblasts	1	male	Untransformed
SampleNo5	46.2978	44-M	MSN	44	male	Lentiviral miR-9/9-124-CDM
SampleNo6	45.763	44-C	Fibroblasts	44	male	Untransformed
SampleNo7	64.562	92A-M	MSN	92	male	Lentiviral miR-9/9-124-CDM
SampleNo8	71.6343	92A-C	Fibroblasts	92	male	Untransformed
SampleNo9	51.7346	92B-C	Fibroblasts	92	female	Untransformed
SampleNo10	45.525	31-M	MSN	31	male	Lentiviral miR-9/9-124-CDM
SampleNo11	40.0243	31-C	Fibroblasts	31	male	Untransformed
SampleNo12	36.1857	10B-C-2	Fibroblasts	10	male	Untransformed
SampleNo13	55.6066	11A-C	Fibroblasts	11	male	Untransformed
SampleNo14	31.1852	17A-C	Fibroblasts	17	male	Untransformed
SampleNo15	38.0769	05M-M	MSN	0.42	male	Lentiviral miR-9/9-124-CDM
SampleNo16	26.9299	05M-C	Fibroblasts	0.42	male	Untransformed
SampleNo17	23.4612	07B-C	Fibroblasts	7	male	Untransformed
SampleNo18	37.4979	08A-C	Fibroblasts	8	male	Untransformed
SampleNo19	66.1341	92A-C	Fibroblasts	92	male	Untransformed
SampleNo20	40.5913	90-C	Fibroblasts	90	male	Untransformed
SampleNo21	21.5657	05-M	MSN	5	male	Lentiviral miR-9/9-124-CDM
SampleNo22	43.4306	05-C	Fibroblasts	5	male	Untransformed
SampleNo23	64.5445	56-C	Fibroblasts	56	male	Untransformed
SampleNo24	38.3025	10C-C	Fibroblasts	10	male	Untransformed
SampleNo25	37.274	10A-C	Fibroblasts	10	male	Untransformed
SampleNo26	31.5947	08B-C	Fibroblasts	8	male	Untransformed
SampleNo27	38.3423	10B-C	Fibroblasts	10	male	Untransformed
SampleNo28	39.3765	07A-C	Fibroblasts	7	male	Untransformed
SampleNo29	41.468	90-M	MSN	90	male	Lentiviral miR-9/9-124-CDM
SampleNo30	65.3734	89-M	MSN	89	male	Lentiviral miR-9/9-124-CDM
SampleNo31	41.4257	90-C	Fibroblasts	90	male	Untransformed
SampleNo32	62.3123	89-C	Fibroblasts	89	male	Untransformed
SampleNo33	17.0717	03D-M	MSN	0	male	Lentiviral miR-9/9-124-CDM
SampleNo34	19.4736	03D-C	Fibroblasts	0	male	Untransformed
SampleNo35	55.4543	96-M	MSN	96	male	Lentiviral miR-9/9-124-CDM
SampleNo36	81.0342	91-M	MSN	91	male	Lentiviral miR-9/9-124-CDM
SampleNo37	47.8881	92B-C	Fibroblasts	92	female	Untransformed
SampleNo38	82.839	91-C	Fibroblasts	91	male	Untransformed
SampleNo39	17.7692	02-M	MSN	2	male	Lentiviral miR-9/9-124-CDM
SampleNo40	23.5099	02-C	Fibroblasts	2	male	Untransformed
SampleNo41	41.5055	12-M	MSN	12	male	Lentiviral miR-9/9-124-CDM
SampleNo42	41.6049	12-C	Fibroblasts	12	male	Untransformed
SampleNo43	41.8461	12B-M	MSN	12	male	Lentiviral miR-9/9-124-CDM
SampleNo44	32.2529	06-C	Fibroblasts	6	male	Untransformed
SampleNo45	35.1966	12B-C	Fibroblasts	12	male	Untransformed
SampleNo46	50.0588	19A-C	Fibroblasts	19	male	Untransformed
SampleNo47	39.4631	19C-C	Fibroblasts	19	male	Untransformed
SampleNo48	60.2862	68-M	MSN	68	male	Lentiviral miR-9/9-124-CDM
SampleNo49	65.2754	68-C	Fibroblasts	68	male	Untransformed
SampleNo50	58.5549	94-M	MSN	94	male	Lentiviral miR-9/9-124-CDM
SampleNo51	56.3348	74-C	Fibroblasts	74	male	Untransformed
SampleNo52	56.8103	94-C	Fibroblasts	94	male	Untransformed
SampleNo53	55.4488	86-C	Fibroblasts	86	male	Untransformed
