# Supplementary material for: Maintenance of age in human neurons generated by microRNA-based neuronal conversion of fibroblasts
Source: eLife journal article supplement (doi:10.7554/elife.18648), 2016-09-20
Supplement: supp [file elife-18648-supp-v1.zip › elife_poa_e18648_Figure_3_source_data_1.xlsx]

## Sheet: 9124 page 1
Sample Name	Target Name	Cт Mean
01 9124	RNU44	23.7443
3D 9124	RNU44	24.5029
5M 9124	RNU44	24.4218
90 9124	RNU44	24.1981
91 9124	RNU44	24.008
92A 9124	RNU44	24.3535
92B 9124	RNU44	24.9679
01 9124	miR-195	26.9884
3D 9124	miR-195	27.5526
5M 9124	miR-195	27.6166
90 9124	miR-195	27.1902
91 9124	miR-195	25.7851
92A 9124	miR-195	26.9797
92B 9124	miR-195	26.9772
01 9124	miR-10a	30.6977
3D 9124	miR-10a	30.9843
5M 9124	miR-10a	30.994
90 9124	miR-10a	24.9634
91 9124	miR-10a	25.9333
92A 9124	miR-10a	26.6947
92B 9124	miR-10a	26.5628

## Sheet: 9124 page 2
Sample Name	Target Name	Cт Mean
01 9124	RNU44	26.1634
01 9124 2	RNU44	26.9051
02 9124	RNU44	25.4677
02 9124 2	RNU44	25.1238
05 9124	RNU44	27.3665
05 9124 2	RNU44	27.3272
12 9124	RNU44	25.3511
12 9124 2	RNU44	25.8593
89 9124	RNU44	26.8795
89 9124 2	RNU44	29.4351
91 9124	RNU44	29.0716
91 9124 2	RNU44	31.8004
96 9124	RNU44	26.7405
96 9124 2	RNU44	26.1142
01 9124	663b	31.3965
01 9124 2	663b	32.7484
02 9124	663b	31.3281
02 9124 2	663b	30.1026
05 9124	663b	30.2617
05 9124 2	663b	30.8033
12 9124	663b	29.0878
12 9124 2	663b	29.6833
89 9124	663b	31.6894
89 9124 2	663b	32.2385
91 9124	663b	32.7468
91 9124 2	663b	35.427
96 9124	663b	31.2314
96 9124 2	663b	29.3683
01 9124	497	34.2775
01 9124 2	497	36.0194
02 9124	497	34.1749
02 9124 2	497	34.0506
05 9124	497	35.4167
05 9124 2	497	33.4867
12 9124	497	31.625
12 9124 2	497	31.8276
89 9124	497	30.2069
89 9124 2	497	31.8623
91 9124	497	32.6159
91 9124 2	497	35.9747
96 9124	497	31.7989
96 9124 2	497	30.6627
2 refers to second biological replicate (not technical replicate)

## Sheet: 9124 page 3
Sample Name	Target Name	Cт Mean	Cт SD
Sample 1	RNU44	27.3193	0.134095
Sample 2	RNU44	27.3822	0.244929
Sample 3	RNU44	26.3889	0.0543024
Sample 4	RNU44	26.9885	0.218544
Sample 5	RNU44	26.4505	0.359978
Sample 6	RNU44	27.7984	0.252851
Sample 7	RNU44	27.3281	0.400676
Sample 8	RNU44	27.1493	0.249312
Sample 1	miR-497	34.852	3.19165
Sample 2	miR-497	32.1301	0.291613
Sample 3	miR-497	32.789	1.13079
Sample 4	miR-497	30.7932	0.182409
Sample 5	miR-497	29.6027	0.61866
Sample 6	miR-497	33.1192	0.484904
Sample 7	miR-497	31.073	0.587681
Sample 8	miR-497	31.3952	0.151537

## Sheet: cortex samples
Sample Name	Target Name	Cт Mean
9Y	RNU44	29.5431
87Y	RNU44	31.1647
85Y	RNU44	29.4968
83Y	RNU44	31.2715
19Y	RNU44	28.5052
11Y	RNU44	29.182
9Y	663b	31.9756
87Y	663b	30.0583
85Y	663b	30.7641
83Y	663b	31.2157
19Y	663b	31.1763
11Y	663b	30.1494
9Y	497	34.1371
87Y	497	31.417
85Y	497	31.4131
83Y	497	33.4496
19Y	497	31.4708
11Y	497	31.6417
9Y	195	29.5108
87Y	195	28.4307
85Y	195	28.3081
83Y	195	29.5554
19Y	195	28.0729
11Y	195	28.7061
9Y	10a	32.5903
87Y	10a	31.6375
85Y	10a	32.2556
83Y	10a	32.3022
19Y	10a	31.1727
11Y	10a	32.192

## Sheet: striatum samples
Sample Name	Target Name	Cт Mean
11Y	RNU44	28.0395
19Y	RNU44	26.4604
83Y	RNU44	30.3034
85Y	RNU44	28.3844
87Y	RNU44	31.9025
11Y	663b	28.7494
19Y	663b	28.9139
83Y	663b	28.9642
85Y	663b	28.8392
87Y	663b	29.4753
11Y	497	32.5723
19Y	497	29.7226
83Y	497	31.7917
85Y	497	32.4789
87Y	497	33.2005
11Y	195	29.2371
19Y	195	26.5275
83Y	195	28.9382
85Y	195	28.7245
87Y	195	30.1173
11Y	10a	31.2341
19Y	10a	29.0465
83Y	10a	31.0553
85Y	10a	31.1752
87Y	10a	32.5916
