# Supplementary material for: Maintenance of age in human neurons generated by microRNA-based neuronal conversion of fibroblasts
Source: eLife journal article supplement (doi:10.7554/elife.18648), 2016-09-20
Supplement: supp [file elife-18648-supp-v1.zip › elife_poa_e18648_Figure_3_source_data_2.xlsx]

## Sheet: Age downregulated GO
SUID	adjustedPValue_msn down	description_msn down	name
293	6.2917e-11	cellular process	9987	IPO13 POP5 TRIO CLPB FRMPD4 EHMT2 EHMT1 ENO1 ENO2 ELK1 SUV420H1 RRP9 LSM10 LSM11 PSMD2 CDK20 AKT1 PIP4K2B MPV17 PRKACA JUNB TMEM8A GAMT DDX17 STARD3 ACOT7 SECISBP2 PIH1D1 SERPINF1 PRKCE CD3EAP PRKCA ISL1 SND1 SCAMP2 HCFC1 EID1 ADCY9 SCO2 FEZ1 UQCRC1 PSME1 PRKD2 LRPAP1 PRKDC RPN1 MRPL14 LYPD3 THY1 ABCB9 AAAS PLA2G6 OAZ2 ANAPC11 PRDX2 PRDX5 PPP4C RNF216 NTHL1 BLOC1S1 EXPH5 NR2C2AP FZD1 PLK3 JUN ZNF…
108	4.3023e-07	cellular metabolic process	44237	POP5 TRIO EHMT1 ENO1 ENO2 SUV420H1 RRP9 LSM10 LSM11 ALKBH4 CAPNS1 PSMD2 CDK20 AKT1 PIP4K2B MPV17 PRKACA JUNB CHID1 GAMT DDX17 STARD3 ACOT7 SECISBP2 PRKCE CD3EAP PRKCA ISL1 HCFC1 SCO2 FEZ1 UQCRC1 PSME1 PRKD2 PLBD2 LRPAP1 PRKDC RPN1 CFI MRPL14 PLA2G6 OAZ2 ANAPC11 CYB5R2 CYB5R1 PRDX2 PRDX5 ADAMTS19 NTHL1 PLK3 CHKB ICMT PMM2 PLK1 MRPL27 FN1 MRPL28 NR2F2 MRPL24 NFATC4 TBL3 PPP5C HNRNPK FASN NAPEPLD PP…
274	4.3023e-07	metabolic process	8152	POP5 TRIO EHMT1 ENO1 ENO2 SUV420H1 RRP9 LSM10 LSM11 PSMD2 CDK20 AKT1 PIP4K2B MPV17 PRKACA JUNB GAMT DDX17 ACOT7 SECISBP2 PRKCE CD3EAP PRKCA ISL1 HCFC1 FEZ1 UQCRC1 PSME1 PRKD2 LRPAP1 PRKDC RPN1 MRPL14 PLA2G6 OAZ2 ANAPC11 PRDX2 NTHL1 PLK3 CHKB ICMT PMM2 PLK1 MRPL27 FN1 MRPL28 MRPL24 NFATC4 TBL3 PPP5C HNRNPK FASN NAPEPLD PPT1 CDK10 MMS19 PPT2 RNF220 CDK16 PIGS CDKN1A PIGQ PRKAG1 MRPL36 SMG9 MRPL37 S…
529	2.4038e-06	primary metabolic process	44238	POP5 TRIO EHMT1 ENO1 ENO2 SUV420H1 RRP9 LSM10 LSM11 CAPNS1 PSMD2 CDK20 AKT1 PIP4K2B PRKACA JUNB CHID1 GAMT DDX17 STARD3 ACOT7 SECISBP2 PRKCE CD3EAP PRKCA HCFC1 FEZ1 UQCRC1 PSME1 PRKD2 PLBD2 LRPAP1 PRKDC RPN1 CFI MRPL14 PLA2G6 OAZ2 ANAPC11 CYB5R2 CYB5R1 PRDX2 ADAMTS19 NTHL1 PLK3 CHKB ICMT PMM2 PLK1 MRPL27 FN1 MRPL28 NR2F2 MRPL24 NFATC4 TBL3 PPP5C HNRNPK FASN NAPEPLD PPT1 CDK10 MMS19 PLCH1 PPT2 RNF…
483	4.7952e-05	negative regulation of molecular function	44092	CDKN1C CDKN1A ILK ARRB1 RGS3 PSMD2 PIM1 AKT1 PRKACA TRIM21 YWHAG MEN1 DUSP3 ANAPC7 PDPK1 APLP1 NOSIP TSC2 PRKCA COMMD7 ADCY9 SMO IL1B CAT PSME1 ANAPC5 LRPAP1 FICD GPS1 RPN1 IFI6 ADCY3 GPS2 MLLT1 THY1 THBS1 PSMA7 ANAPC11 PRDX2 PSMB3 CNR1 SH3BP5 RPS3 HEXIM1 CDKN2D JUN SIVA1 LIMK1 DHCR24 NR2F2 DAP PSMC4 DNAJA3 CALM3 TCF4 PKIG
533	0.0001431	cellular macromolecule metabolic process	44260	POP5 TRIO EHMT1 ZDHHC1 SUV420H1 RRP9 LSM10 RPS14 LSM11 TRIM28 RPL18A KAT5 PSMD2 CDK20 LONP1 AKT1 PRKACA TRIM21 JUNB PDK2 DDX17 COG7 SECISBP2 PRKCE NSMCE1 CD3EAP MRPS18A PRKCA CSNK1E HCFC1 JMJD6 POR FEZ1 XRN2 PSME1 ULK1 PRKD2 LRPAP1 DHX8 PRKDC RPN1 MRPL14 GSPT1 ANAPC11 PRDX2 NTHL1 MAP2 PCBP2 RBM10 PLK3 TRAP1 ICMT SIAH3 INTS3 TREX1 PMM2 PLK1 MRPL27 FN1 MRPL28 DCLK2 MRPL24 NFATC4 TBL3 POLA2 PPP5C HN…
416	0.00031352	system development	48731	SPON2 SPARC PHB2 RPS14 TRIM28 BSG AKT1 MPV17 PRKACA JUNB SERPINF1 PRKCA MIF JMJD6 FEZ1 NINJ1 ULK1 ATP6V0D1 PRKDC STXBP1 THY1 APCDD1 ATP5B PRDX2 MAP2 SCAP PATZ1 HEXIM1 FZD1 EGR1 JUN EGR2 FZD2 CHKB ICMT CADM1 FZD4 FN1 IGF2 NR2F2 COL1A2 PPT1 GRB2 CALR MKX ITM2C CDKN1C NRP1 PTPRU CDKN1A RARG C2CD3 ELN SECTM1 PTPRJ MYL6B ECSIT EDA2R SUFU ENC1 TRIM3 TIMP2 SDF4 TIMP3 TIMP1 CTSB TEAD4 PSD RING1 ACTL6B TN…
316	0.00034293	negative regulation of cellular metabolic process	31324	CDKN1C PTPRU CDKN1A RARG NDUFA13 ACADVL UBXN1 CBY1 EHMT1 ARRB1 ENO1 PHB2 RPS14 TRIM28 KAT5 PSMD2 SUFU MLX UBTF BDKRB2 AKT1 TIMP3 TIMP1 PRKACA TRIM21 MEN1 KDM6B G6PD ANAPC7 IGFBP5 IGFBP3 HGF APLP1 ARID5A PRKCA COMMD7 TERF2 NCOR2 EID1 NPC1 PSME1 ANAPC5 VPS28 DLX1 ZNF593 HDAC3 LRP1 CNP RPN1 TWIST2 GPS2 ATP1A1 ASCL2 PSMA7 ANAPC11 DNAJB2 PRDX2 WNT11 PSMB3 CNR1 DNAJB5 BAHD1 RPS3 INPP5K MSX1 SLIT2 MTA2 …
415	0.00034293	multicellular organismal development	7275	SPON2 SPARC KEAP1 PHB2 RPS14 TRIM28 BSG CDK20 AKT1 MPV17 PRKACA JUNB WLS DYNC2H1 SERPINF1 PRKCA MIF EBF4 ISL1 JMJD6 FEZ1 GPR161 NINJ1 ULK1 ATP6V0D1 HKR1 PRKDC STXBP1 TWIST2 THY1 APCDD1 ATP5B PRDX2 MAP2 SCAP INPP5K PATZ1 HEXIM1 FZD1 EGR1 JUN EGR2 PHC2 FZD2 CHKB ICMT CADM1 FZD4 SIAH3 FN1 IGF2 PBX2 NR2F2 COL1A2 PPT1 GRB2 CALR MKX ITM2C CDKN1C NRP1 PTPRU CDKN1A RARG C2CD3 ELN SECTM1 PTPRJ MYL6B ECSIT…
256	0.00041544	negative regulation of cellular process	48523	RERE IPO13 NDUFA13 CLTB ATP2A2 CLTA ARRB1 MYL6B GRIK2 SMG6 HK1 SEC61A1 C16ORF70 CPT2 TOM1 MLX AKT1 KIF1B ERC1 TNPO2 AP2M1 YWHAG SCYL1 STARD3 SEC13 COG7 SSR4 SSR2 TAP1 TSC2 ARFGAP1 COPZ1 SCAMP2 TAPBP RHOB TOM1L2 NPC1 PACS1 HGS PICK1 MYH9 PREB KDELR2 SLC25A12 SQSTM1 CHMP7 VPS4A KATNB1 AAAS ATP5B SNX1 KLC2 BLOC1S1 ATP5D AP2S1 STX4 SEC23B RAB11FIP3 MYH10 EXPH5 AP1M1 CTSA JUN ZNF384 ICMT TRAPPC1 TGFB1…
315	0.00041544	negative regulation of metabolic process	9892	NDUFA13 EHMT1 ENO1 PHB2 RPS14 TRIM28 KAT5 PSMD2 AKT1 PRKACA TRIM21 MEN1 G6PD ANAPC7 IGFBP5 IGFBP3 HGF APLP1 ARID5A PRKCA MIF SND1 EID1 PSME1 ANAPC5 VPS28 DLX1 CNP RPN1 TWIST2 ANAPC11 PRDX2 SCAP INPP5K N4BP1 WDTC1 HEXIM1 ZBTB18 FZD1 EGR1 EIF2B4 JUN UBE2I TGFB1 NR2F2 SUPT5H DAP TCF4 CALR PKIG CDKN1C PTPRU CDKN1A RARG ACADVL UBXN1 CBY1 ARRB1 SUFU MLX UBTF BDKRB2 TIMP3 TIMP1 KDM6B COMMD7 TERF2 NCOR2 …
384	0.00041544	intracellular transport	46907	ARF3 SCARB1 DGKD RAB3A CLTB CLTA ARRB1 HK1 MRC2 C16ORF70 TOM1 CPNE1 SDF4 ERC1 ZFPL1 AP2M1 SH3GL1 SCYL1 MAP4K2 SEC13 HLA-H COG7 APLP1 ANXA11 TSC2 ARFGAP1 COPZ1 SCAMP2 TAPBP JMJD6 RHOB NPC1 PACS1 HGS PICK1 PREB KDELR2 ULK1 ERGIC3 MFGE8 SQSTM1 CHMP7 ARF5 EXOC2 VAMP3 GRIA1 LRPAP1 LRP1 STXBP1 VPS4A STXBP2 THBS1 ATP5B SNX1 BLOC1S1 AP2S1 STX4 SEC23B RAB11FIP3 AP1M1 MARCKSL1 TRAPPC1 OSBPL5 GBF1 HIP1R PUM…
432	0.00041544	vesicle-mediated transport	16192	IFITM1 NDUFA13 EHMT1 ENO1 PHB2 ELK1 RPS14 STK11 RGS3 TRIM28 KAT5 PSMD2 SESN1 PEG10 ARHGDIA SESN2 PIM1 AKT1 PRKACA TRIM21 TMSB10 MEN1 G6PD ANAPC7 IGFBP5 ACTN1 SERPINF1 IGFBP3 HGF APLP1 WNT5A ARID5A P3H1 TSC2 LDOC1 PRKCA ACTN4 MIF EID1 SMO HGS PSME1 ANAPC5 ULK1 AURKAIP1 SQSTM1 VCL VPS28 DLX1 CNP MAGED1 STXBP1 RPN1 TWIST2 THY1 APCDD1 ANAPC11 ATP5B PRDX2 PRDX5 RRAS MAP2 INPP5K N4BP1 BCL9L WDTC1 HEXIM…
664	0.00041544	negative regulation of cellular protein metabolic process	32269	NDUFA13 UBXN1 RPN1 ARRB1 PSMA7 ANAPC11 DNAJB2 PSMB3 PSMD2 BDKRB2 TIMP3 INPP5K SLIT2 TIMP1 PRKACA TRIM21 N4BP1 MEN1 EIF2B4 JUN G6PD TGFB1 ANAPC7 IGFBP5 NR1H2 IGFBP3 LIMK1 PRKCA PSMC4 PSME1 ANAPC5 CALR VPS28 TNRC6A
465	0.00051021	cellular protein metabolic process	44267	SEMA5A CHRM2 SPON2 RAB3A NAB2 GRIP1 NAGLU ARHGDIA AKT1 PRKACA SH3GL1 LMO4 SERPINF1 HGF APLP1 WNT5A TSC2 PRKCA PGD SMO DOK4 FEZ1 NINJ1 S100A6 ULK1 ATP6V0D1 DLX1 RTN1 CNP PRKDC STXBP1 HTRA2 THY1 DEAF1 MAP2 PSAP MARK4 WNT2 TFAP2A FZD1 EIF2B4 EGR2 FZD2 TGFB1 CADM1 FZD4 PTCH1 CRIM1 TBCB NR2F2 DAB1 RCAN2 PPT1 PLXNB2 TCF4 CALR ITM2C CDKN1C GPSM1 NRP1 C2CD3 ILK NRGN NGRN IFT52 SIX4 MDK SUFU ENC1 TRIM3 TI…
790	0.00051021	nervous system development	7399	TRIO EHMT1 ZDHHC1 SUV420H1 RPS14 TRIM28 RPL18A KAT5 PSMD2 CDK20 LONP1 AKT1 PRKACA TRIM21 PDK2 COG7 SECISBP2 PRKCE MRPS18A PRKCA CSNK1E JMJD6 PSME1 ULK1 PRKD2 LRPAP1 PRKDC RPN1 MRPL14 GSPT1 ANAPC11 PRDX2 MAP2 PCBP2 PLK3 TRAP1 ICMT SIAH3 PMM2 PLK1 MRPL27 FN1 MRPL28 DCLK2 MRPL24 PPP5C PPT1 CDK10 CALR PPT2 RNF220 AARS CDK16 PIGS PTPRU CDKN1A PTPRS UBXN1 PIGQ MRPS11 PRKAG1 MRPL36 PTPRJ MRPL37 MRPL41 L…
144	0.00053652	negative regulation of protein metabolic process	51248	NDUFA13 UBXN1 RPN1 ARRB1 THBS1 PSMA7 ANAPC11 DNAJB2 PSMB3 PSMD2 BDKRB2 TIMP3 INPP5K SLIT2 TIMP1 PRKACA TRIM21 N4BP1 MEN1 EIF2B4 JUN G6PD TGFB1 ANAPC7 IGFBP5 NR1H2 IGFBP3 LIMK1 PRKCA PSMC4 PSME1 ANAPC5 CALR VPS28 TNRC6A
519	0.00057796	macromolecule localization	33036	IPO13 SCARB1 NDUFA13 DGKD RAB3A CD81 HDLBP GRIP1 TOM1 AKT1 TMSB10 AP2M1 STARD3 COG7 WNT5A TAP1 TSC2 ACTN4 SCAMP2 PDIA4 TOM1L2 HGS RAB34 PREB KDELR2 ULK1 TLN1 SQSTM1 VPS25 SLC27A5 VCL VPS28 RAB5B RAB5C STXBP1 STXBP2 AGAP2 ABCB9 SNX1 PSAP RAB11FIP3 PLTP EXPH5 AP1M1 CTSA JUN ICMT TGFB1 OSBPL5 GOT2 HPS4 TIMM44 DHCR24 POLA2 PPT1 CALR COPE ARF3 RERE PTPRU CLTB CBY1 CLTA ARRB1 GRIK2 SMG6 HK1 SEC61A1 C16…
236	0.00061281	anatomical structure development	48856	SPON2 SPARC PHB2 RPS14 TRIM28 BSG AKT1 MPV17 PRKACA JUNB SERPINF1 PRKCA MIF JMJD6 FEZ1 NINJ1 ULK1 ATP6V0D1 PRKDC STXBP1 THY1 APCDD1 ATP5B PRDX2 MAP2 SCAP PATZ1 HEXIM1 FZD1 EGR1 FIS1 JUN EGR2 FZD2 CHKB ICMT CADM1 FZD4 MCAM FN1 IGF2 PBX2 NR2F2 COL1A2 FAT1 PPT1 GRB2 CALR MKX ITM2C CDKN1C NRP1 PTPRU CDKN1A RARG C2CD3 ELN SECTM1 PTPRJ MYL6B ECSIT EDA2R SUFU ENC1 TRIM3 TIMP2 SDF4 TIMP3 TIMP1 CTSB TEAD4…
503	0.00061281	macromolecule metabolic process	43170	POP5 TRIO EHMT1 ZDHHC1 SUV420H1 RRP9 LSM10 RPS14 LSM11 CAPNS1 TRIM28 RPL18A KAT5 PSMD2 CDK20 LONP1 AKT1 PRKACA TRIM21 JUNB PDK2 CHID1 DDX17 COG7 SECISBP2 PRKCE NSMCE1 CD3EAP MRPS18A PRKCA CSNK1E HCFC1 JMJD6 POR FEZ1 XRN2 UQCRC1 PSME1 ULK1 PRKD2 LRPAP1 DHX8 PRKDC RPN1 CFI MRPL14 GSPT1 ANAPC11 PRDX2 ADAMTS19 NTHL1 MAP2 PCBP2 RCE1 RBM10 CTSA PLK3 TRAP1 ICMT SIAH3 INTS3 TREX1 PMM2 PLK1 MRPL27 FN1 MRP…
213	0.00061734	developmental process	32502	SPON2 SPARC KEAP1 PHB2 RPS14 TRIM28 PEG10 BSG CDK20 AKT1 MPV17 PRKACA JUNB WLS DYNC2H1 SERPINF1 PRKCA MIF EBF4 ISL1 JMJD6 EID1 FEZ1 GPR161 NINJ1 ULK1 ATP6V0D1 HKR1 PRKDC STXBP1 TWIST2 THY1 APCDD1 ATP5B PRDX2 MAP2 SCAP INPP5K PATZ1 HEXIM1 FZD1 EGR1 FIS1 JUN EGR2 PHC2 FZD2 CHKB ICMT CADM1 FZD4 SIAH3 MCAM FN1 IGF2 PBX2 NR2F2 NFATC4 COL1A2 FAT1 PPT1 GRB2 CALR MKX ITM2C CDKN1C NRP1 PTPRU CDKN1A RARG C…
255	0.00061734	negative regulation of biological process	48519	IFITM1 NDUFA13 EHMT1 ENO1 PHB2 ELK1 RPS14 STK11 RGS3 TRIM28 KAT5 PSMD2 SESN1 PEG10 ARHGDIA SESN2 PIM1 AKT1 PRKACA TRIM21 TMSB10 MEN1 G6PD ANAPC7 IGFBP5 ACTN1 SERPINF1 IGFBP3 HGF APLP1 WNT5A ARID5A TAP1 P3H1 TSC2 LDOC1 PRKCA ACTN4 MIF SND1 EID1 SMO COL4A2 HGS PSME1 ANAPC5 ULK1 AURKAIP1 SQSTM1 VCL VPS28 DLX1 LRPAP1 CNP MAGED1 STXBP1 RPN1 TWIST2 THY1 APCDD1 ANAPC11 ATP5B PRDX2 PRDX5 RRAS MAP2 PCBP2 …
506	0.00061734	negative regulation of kinase activity	33673	HEXIM1 CDKN1C CDKN1A DUSP3 PDPK1 GPS1 ILK GPS2 TSC2 MLLT1 PRKCA THY1 NR2F2 RGS3 IL1B DNAJA3 SH3BP5 AKT1 PRKACA PKIG YWHAG MEN1
114	0.00061977	negative regulation of protein modification process	31400	UBXN1 RPN1 ARRB1 PSMA7 ANAPC11 DNAJB2 PSMB3 PSMD2 BDKRB2 INPP5K SLIT2 PRKACA TRIM21 N4BP1 MEN1 JUN G6PD TGFB1 ANAPC7 IGFBP3 LIMK1 PRKCA PSMC4 PSME1 ANAPC5 VPS28
135	0.00061977	establishment of localization in cell	51649	SPON2 EHMT2 EHMT1 SUV420H1 RPS14 TRIM28 KAT5 LONP1 AKT1 MPV17 PRKACA TRIM21 DYNC2H1 HLA-H CPT1A ACTN1 PIH1D1 PRKCA ACTN4 MIF JMJD6 HIST2H3A SCO2 FEZ1 XRN2 PREB ULK1 HIST2H3D TLN1 PRKDC STXBP1 THY1 ANAPC11 ATP5B SNX1 PPP4C HIST1H3A BLOC1S1 MAP2 TSPAN4 HIST1H3F HIST1H3G INPP5K ASL HIST1H3I HIST1H3D FIS1 JUN EGR2 CADM1 HIST1H4K PLK1 FN1 PUM1 PPP5C COL1A2 TRIP6 PPT1 GRB2 CALR HIST1H4F NRP1 C2CD3 PHF1…
219	0.00061977	cellular component organization	16043	RERE IPO13 NDUFA13 RAB3A CLTB ATP2A2 CLTA ARRB1 MYL6B GRIK2 SMG6 HK1 SEC61A1 C16ORF70 CPT2 TOM1 MLX AKT1 SDF4 KIF1B ERC1 TNPO2 AP2M1 YWHAG SCYL1 STARD3 MAP4K2 SEC13 COG7 DGAT1 SSR4 SSR2 HGF TAP1 TSC2 ARFGAP1 COPZ1 SCAMP2 TAPBP RHOB PDIA4 TOM1L2 NPC1 PACS1 HGS FEZ1 PICK1 MYH9 PREB KDELR2 SLC25A12 SQSTM1 CHMP7 EXOC2 VAMP3 LY6E STXBP1 VPS4A STXBP2 KATNB1 NRXN2 AAAS NTN1 ATP5B SNX1 KLC2 BLOC1S1 ATP5D…
326	0.00083179	protein localization	8104	HEXIM1 CDKN1A DUSP3 PDPK1 GPS1 ILK GPS2 TSC2 MLLT1 PRKCA THY1 NR2F2 RGS3 IL1B DNAJA3 SH3BP5 AKT1 PRKACA PKIG YWHAG MEN1
366	0.00083179	positive regulation of cellular component organization	51130	CD63 FRMPD4 KATNB1 ILK ARRB1 AHR NTN1 WNT11 CNR1 ARHGDIA GPC3 AKT1 SLIT2 PRKACA BCL9L MEN1 TGFB1 TNFRSF12A PDPK1 NR1H2 LIMK1 IGF2 PRKCA ACTN4 TERF2 SORBS3 PINK1 FEZ1 IL1B PPT1 ADAM9 PLXNB2 STUB1 CALR MFGE8
463	0.00083179	regulation of cellular component organization	51128	NRP1 SCARB1 RAB3A FRMPD4 ILK ARRB1 AHR ARHGDIA AKT1 PRKACA SPTAN1 TMSB10 MEN1 PRMT5 TNFRSF12A PDPK1 TSC2 PRKCA ACTN4 MIF TERF2 HCFC1 FEZ1 IL1B ERF ADAM9 MYH9 ULK1 MFGE8 AURKAIP1 DBN1 CD63 RAB5B RAB5C STXBP1 KATNB1 THY1 NTN1 THBS1 ADD1 DNAJB2 WNT11 CNR1 HECTD3 MAP2 AP2S1 GPC3 SLIT2 MYH10 BCL9L TGFB1 NR1H2 LIMK1 FN1 IGF2 SORBS3 PINK1 PC COL5A1 ERCC1 PPT1 PLXNB2 MAP6D1 STUB1 CALR ITM2C
673	0.00083179	negative regulation of protein kinase activity	6469	IPO13 NDUFA13 DGKD RAB3A CD81 GRIP1 TOM1 AKT1 TMSB10 AP2M1 COG7 WNT5A TAP1 TSC2 ACTN4 SCAMP2 PDIA4 TOM1L2 HGS RAB34 PREB KDELR2 ULK1 TLN1 SQSTM1 VPS25 VCL VPS28 RAB5B RAB5C STXBP1 STXBP2 AGAP2 ABCB9 SNX1 RAB11FIP3 EXPH5 AP1M1 CTSA JUN ICMT TGFB1 HPS4 TIMM44 DHCR24 POLA2 PPT1 CALR COPE ARF3 RERE PTPRU CLTB CBY1 CLTA ARRB1 GRIK2 HK1 SEC61A1 C16ORF70 SUFU TRIM3 ERC1 TNPO2 YWHAG SEC13 SSR4 SSR2 VPS37…
217	0.00094926	negative regulation of cellular component movement	51271	PTPRU CD63 EGFL7 TGFB1 IGFBP5 ACTN1 IGFBP3 ILK THY1 NR2F2 ACTN4 TBX5 THBS1 WNT11 RRAS SLIT2 VCL
149	0.00096643	regulation of cell death	10941	NRP1 CDKN1A RARG NDUFA13 TRIO B4GALT1 CHD8 ILK GRIK2 ELK1 SPPL3 SMPD2 GRIP1 SIX4 CASP6 ARHGDIA MCF2L PEA15 PIM1 MYO18A BDKRB2 AKT1 PRKACA CTNNBL1 CTSB MEN1 DFFA PLEKHG2 ACTN1 PRKCE IGFBP3 TUBB HGF WNT5A SHISA5 PRKCA AEN ACTN4 MIF RNF41 ARHGEF9 KAT2A SMO DDAH2 IL1B DNAJC5 CAT PDE5A SQSTM1 SLC25A4 DLX1 BECN1 HDAC3 PRKDC MAGED1 GSTP1 AMIGO2 TWIST2 IFI6 KATNB1 HTRA2 TEX261 ACVR1B THBS1 GSPT1 PRDX2 PR…
717	0.00099694	embryonic development ending in birth or egg hatching	9792	C2CD3 CHD8 KEAP1 IFT52 SIX4 SUFU AKT1 JUNB MEN1 PDGFRB TEAD4 OSR2 PRMT1 LMO4 WNT5A TSC2 TERF2 NCOR2 KAT2A SMO AHRR MYH9 LY6E DLX1 PRKDC TULP3 ACVR1B ASCL2 WNT11 DEAF1 INPP5K MSX1 SLIT2 WNT2 WDTC1 TFAP2A GINS1 ICMT PTCH1 TBX3 XAB2 MYO1C ETNK2 PSMC4 GRB2 TCF4 APBA1 PLCD3 APBA2
594	0.0010136	peptidyl-threonine phosphorylation	18107	PAK1 PDPK1 MAP2 ADRBK1 CAD PRKCA PKN1 PRKACA ACVR1B
505	0.0010393	negative regulation of transferase activity	51348	HEXIM1 CDKN1C CDKN1A DUSP3 PDPK1 GPS1 ILK GPS2 TSC2 MLLT1 PRKCA THY1 NR2F2 RGS3 IL1B DNAJA3 SH3BP5 AKT1 PRKACA PKIG YWHAG MEN1
134	0.0011213	cellular localization	51641	IPO13 NDUFA13 RAB3A TOM1 AKT1 AP2M1 STARD3 COG7 DGAT1 HGF WNT5A TAP1 TSC2 SCAMP2 PDIA4 TOM1L2 HGS FEZ1 PREB KDELR2 TLN1 SQSTM1 VCL LY6E STXBP1 STXBP2 AAAS ATP5B SNX1 KLC2 BLOC1S1 ATP5D RAB11FIP3 MYH10 EXPH5 AP1M1 CTSA JUN ZNF384 ICMT TRAPPC1 TGFB1 OSBPL5 HPS4 TIMM44 PUM1 POLA2 CALR COPE RERE PTPRU CLTB ATP2A2 CLTA ARRB1 MYL6B GRIK2 SMG6 HK1 SEC61A1 C16ORF70 CPT2 SUFU MLX SDF4 KIF1B ERC1 TNPO2 YWH…
146	0.0013511	biosynthetic process	9058	CARS SCARB1 CD81 PLOD1 AHR ZDHHC1 ENO2 NUBP1 FADS2 RPS14 RPL18A UROD AKT1 JUNB GTF2I GAMT STARD3 G6PD RPS9 HLA-H COG7 DGAT1 LIG1 LMO4 SECISBP2 CD3EAP MRPS18A WRNIP1 MIF PGD HCFC1 TUFM FEZ1 XRN2 ATP6V0D1 SLC27A5 CNP MAZ RPN1 MRPL14 PLA2G6 GSPT1 CYB5R2 CYB5R1 ATP5B DEAF1 PMVK ATP5D ASL EIF2B4 CHKB TGFB1 TREX1 PMM2 GOT2 MRPL27 MRPL28 DHCR24 EEF2 SUPT5H MRPL24 NFATC4 COQ4 POLA2 PPP5C COL5A1 FASN PI4K…
164	0.0013511	chordate embryonic development	43009	DLX1 C2CD3 PRKDC CHD8 KEAP1 TULP3 ACVR1B ASCL2 IFT52 WNT11 SIX4 DEAF1 SUFU AKT1 INPP5K MSX1 SLIT2 WNT2 JUNB MEN1 WDTC1 PDGFRB TFAP2A TEAD4 GINS1 OSR2 ICMT PRMT1 LMO4 PTCH1 WNT5A TSC2 TERF2 TBX3 NCOR2 XAB2 KAT2A MYO1C SMO ETNK2 PSMC4 MYH9 GRB2 TCF4 APBA1 PLCD3 APBA2 LY6E
324	0.0013511	regulation of protein catabolic process	42176	EGLN2 UBXN1 RPN1 PLK1 WNT5A CSNK1E DNAJB2 HGS PSMD2 IL1B GPC3 AKT1 TIMP3 ADAM9 STUB1 TIMP1 N4BP1
516	0.0015053	negative regulation of catalytic activity	43086	CDKN1C CDKN1A FICD GPS1 RPN1 IFI6 ILK ADCY3 GPS2 MLLT1 THY1 THBS1 PSMA7 ANAPC11 RGS3 PSMB3 CNR1 PSMD2 SH3BP5 AKT1 PRKACA YWHAG MEN1 HEXIM1 CDKN2D DUSP3 ANAPC7 PDPK1 APLP1 LIMK1 NOSIP TSC2 PRKCA DHCR24 NR2F2 ADCY9 PSMC4 IL1B DNAJA3 PSME1 ANAPC5 PKIG
336	0.0015989	regulation of programmed cell death	43067	NRP1 CDKN1A RARG NDUFA13 TRIO B4GALT1 CHD8 ILK GRIK2 ELK1 SPPL3 SMPD2 GRIP1 SIX4 CASP6 ARHGDIA MCF2L PEA15 PIM1 MYO18A BDKRB2 AKT1 PRKACA CTNNBL1 CTSB MEN1 DFFA PLEKHG2 ACTN1 PRKCE IGFBP3 TUBB HGF WNT5A SHISA5 PRKCA AEN ACTN4 MIF RNF41 ARHGEF9 KAT2A SMO DDAH2 IL1B DNAJC5 CAT PDE5A SQSTM1 DLX1 BECN1 HDAC3 PRKDC MAGED1 GSTP1 AMIGO2 TWIST2 IFI6 HTRA2 TEX261 ACVR1B THBS1 GSPT1 PRDX2 PRDX5 WNT11 CNR1 …
527	0.0016323	cellular component assembly	22607	DGKD IL1RAP RPS14 PIM1 LONP1 TRIM21 HIST1H2AC GTF2I HLA-H CPT1A DGAT1 ACTN1 PIH1D1 HIST1H2AJ TSC2 ACTN4 MIF HIST2H3A SCO2 FSCN1 SRSF5 SNRNP200 HIST2H3D TLN1 VCL MAZ ARL2 THY1 HIST1H3A SCUBE1 ATG101 TSPAN4 HIST1H3F HIST1H3G ASL HIST1H3I HIST1H3D TGFB1 CADM1 HIST1H4K H1F0 PPP5C TRIP6 GRB2 CALR HIST1H4F C2CD3 PRKAG1 CBY1 ILK ARRB1 GRIK2 TUBA1A H2AFJ HIST1H1E CTSD PRMT5 ADSL PDPK1 TUBB DHPS TAPBP TUB…
349	0.0017233	in utero embryonic development	1701	C2CD3 CHD8 KEAP1 TULP3 ACVR1B ASCL2 AKT1 INPP5K MSX1 SLIT2 WNT2 JUNB WDTC1 PDGFRB TEAD4 GINS1 ICMT PRMT1 TERF2 TBX3 NCOR2 XAB2 KAT2A MYO1C SMO ETNK2 PSMC4 MYH9 GRB2 APBA1 PLCD3 APBA2 LY6E
553	0.0017233	regulation of apoptosis	42981	NRP1 CDKN1A RARG NDUFA13 TRIO B4GALT1 CHD8 ILK GRIK2 ELK1 SPPL3 SMPD2 GRIP1 SIX4 CASP6 ARHGDIA MCF2L PEA15 PIM1 MYO18A BDKRB2 AKT1 PRKACA CTNNBL1 CTSB MEN1 DFFA PLEKHG2 ACTN1 PRKCE IGFBP3 TUBB HGF WNT5A SHISA5 PRKCA AEN ACTN4 MIF RNF41 ARHGEF9 KAT2A SMO DDAH2 IL1B DNAJC5 CAT PDE5A SQSTM1 DLX1 BECN1 HDAC3 PRKDC MAGED1 GSTP1 AMIGO2 TWIST2 IFI6 HTRA2 TEX261 ACVR1B THBS1 GSPT1 PRDX2 PRDX5 WNT11 CNR1 …
691	0.0017233	protein metabolic process	19538	TRIO EHMT1 ZDHHC1 SUV420H1 RPS14 CAPNS1 TRIM28 RPL18A KAT5 PSMD2 CDK20 LONP1 AKT1 PRKACA TRIM21 PDK2 COG7 SECISBP2 PRKCE MRPS18A PRKCA CSNK1E JMJD6 UQCRC1 PSME1 ULK1 PRKD2 LRPAP1 PRKDC RPN1 CFI MRPL14 GSPT1 ANAPC11 PRDX2 ADAMTS19 MAP2 PCBP2 RCE1 CTSA PLK3 TRAP1 ICMT SIAH3 PMM2 PLK1 MRPL27 FN1 MRPL28 DCLK2 MRPL24 PPP5C PPT1 CDK10 CALR PPT2 RNF220 AARS CDK16 PIGS PTPRU CDKN1A PTPRS UBXN1 C2CD3 PIGQ…
703	0.0018569	cellular biosynthetic process	44249	CARS SCARB1 CD81 PLOD1 AHR ZDHHC1 ENO2 NUBP1 FADS2 RPS14 RPL18A UROD AKT1 JUNB GTF2I GAMT G6PD RPS9 COG7 DGAT1 LIG1 LMO4 SECISBP2 CD3EAP MRPS18A WRNIP1 MIF PGD HCFC1 TUFM FEZ1 XRN2 ATP6V0D1 SLC27A5 CNP MAZ RPN1 MRPL14 PLA2G6 GSPT1 ATP5B DEAF1 ATP5D ASL EIF2B4 CHKB TGFB1 TREX1 PMM2 GOT2 MRPL27 MRPL28 EEF2 SUPT5H MRPL24 NFATC4 COQ4 POLA2 PPP5C FASN PI4KA MAP6D1 DEGS1 MMS19 DEGS2 PI4KB AARS PIGS CAL…
299	0.0018976	phosphorylation	16310	CDKN1A TRIO CD81 MAST2 PRKAG1 ILK STK19 TCIRG1 PIK3C2B STK11 TRIM28 PIM1 CDK20 AKT1 SPEG ERC1 PRKACA STK32B PDK2 SCYL1 PDGFRB MAP4K2 ATP6V0B MAP2K2 ATP6AP1 PDPK1 PRKCE IGFBP3 HGF MINK1 CAD WNT5A LMTK2 PRKCA CSNK1E GAK NDUFS8 NDUFS6 MAK IL1B UQCRC1 ATP6V1B2 PICK1 NDUFS2 ADAM9 ULK1 PRKD2 TKT ATP6V0D1 ATP6V0C STK40 NDUFB7 PRKDC ACVR1B THBS1 SRM ATP5B PRDX2 PAK1 MAPK7 WNT11 MAP2 MKNK1 ADRBK1 PMVK ATP…
370	0.0021811	protein transport	15031	ARF3 RERE IPO13 NDUFA13 DGKD RAB3A CLTB CLTA ARRB1 GRIK2 HK1 SEC61A1 C16ORF70 TRIM3 TOM1 AKT1 ERC1 TNPO2 AP2M1 YWHAG SEC13 COG7 SSR4 SSR2 TAP1 TSC2 VPS37B ACTN4 ARFGAP1 COPZ1 SCAMP2 RHOB PDIA4 TOM1L2 PITPNM1 PACS1 HGS RAB34 PICK1 MYH9 PREB KDELR2 VPS25 ARF5 VPS28 EXOC2 ATG4D RAB5B RAB5C RAB1B STXBP1 VPS4A STXBP2 AGAP2 KATNB1 ABCB9 SNX1 LMAN2 AP2S1 STX4 SEC23B RAB11FIP3 EXPH5 AP1M1 CTSA JUN ICMT T…
222	0.0023823	peptidyl-threonine modification	18210	PAK1 PDPK1 MAP2 ADRBK1 CAD PRKCA PKN1 PRKACA ACVR1B
310	0.0026912	regulation of the force of heart contraction	2026	LMO4 ADRBK1 ATP2A2 PRKCA PDE5A ATP1A1 PRKACA SLC8A1
539	0.0031819	regulation of proteolysis	30162	UBXN1 C2CD3 NR1H2 PLK1 CSNK1E DNAJB2 IFT52 IL1B AKT1 TIMP3 ADAM9 STUB1 TIMP1 AURKAIP1 N4BP1
322	0.00322	negative regulation of NF-kappaB transcription factor activity	32088	PRDX2 DAP SIVA1 DNAJA3 CAT RPS3 ARRB1 TRIM21 COMMD7
183	0.0032544	cellular response to stimulus	51716	CLPB CIB1 KAT5 EME2 RUVBL2 SESN1 PIM1 LONP1 AKT1 MPV17 PRKACA JUNB MEN1 PDGFRB G6PD HLA-H FBXO18 LIG1 HGF WNT5A NSMCE1 PRKCA WRNIP1 CSNK1E MIF ADCY9 SMO FEZ1 SQSTM1 PRKDC CACNA1G PRDX2 PRDX5 ATG101 NTHL1 SCAP WNT2 WDTC1 EGR1 EIF2B4 TRAP1 JUN TGFB1 FZD4 INTS3 TREX1 PLK1 IGF2 DAP GNB2 GRB2 MMS19 CDKN1A MCM7 MRPS11 ARRB1 CTSD MAP4K2 GPX4 PDPK1 MINK1 AEN TERF2 DDB2 DDB1 VCAN PITPNM1 IL1B CAT CRY1 AHR…
327	0.0032544	establishment of protein localization	45184	ARF3 RERE IPO13 NDUFA13 DGKD RAB3A CLTB CLTA ARRB1 GRIK2 HK1 SEC61A1 C16ORF70 TRIM3 TOM1 AKT1 ERC1 TNPO2 AP2M1 YWHAG SEC13 COG7 SSR4 SSR2 TAP1 TSC2 VPS37B ACTN4 ARFGAP1 COPZ1 SCAMP2 RHOB PDIA4 TOM1L2 PITPNM1 PACS1 HGS RAB34 PICK1 MYH9 PREB KDELR2 VPS25 ARF5 VPS28 EXOC2 ATG4D RAB5B RAB5C RAB1B STXBP1 VPS4A STXBP2 AGAP2 KATNB1 ABCB9 SNX1 LMAN2 AP2S1 STX4 SEC23B RAB11FIP3 EXPH5 AP1M1 CTSA JUN ICMT T…
356	0.0034941	negative regulation of macromolecule metabolic process	10605	CDKN1C PTPRU RARG NDUFA13 UBXN1 CBY1 EHMT1 ARRB1 ENO1 PHB2 RPS14 TRIM28 KAT5 PSMD2 SUFU MLX UBTF BDKRB2 TIMP3 TIMP1 PRKACA TRIM21 MEN1 KDM6B G6PD ANAPC7 IGFBP5 IGFBP3 HGF ARID5A PRKCA MIF COMMD7 TERF2 SND1 NCOR2 EID1 PSME1 ANAPC5 VPS28 DLX1 ZNF593 HDAC3 LRP1 CNP RPN1 TWIST2 GPS2 ASCL2 THBS1 PSMA7 ANAPC11 DNAJB2 WNT11 PSMB3 DNAJB5 BAHD1 RPS3 INPP5K MSX1 SLIT2 MTA2 N4BP1 WDTC1 HEXIM1 ZBTB18 FZD1 EG…
368	0.0034941	negative regulation of cell migration	30336	PTPRU CD63 EGFL7 TGFB1 IGFBP5 IGFBP3 ILK THY1 NR2F2 TBX5 THBS1 WNT11 RRAS SLIT2 VCL
129	0.003579	retrograde vesicle-mediated transport, Golgi to ER	6890	COG7 GBF1 PICK1 ARFGAP1 COPZ1 COPE TAPBP SCYL1
184	0.0036551	cellular response to stress	33554	HLA-H HLA-B TAP1 CALR HLA-A HLA-F TAPBP
810	0.0036551	antigen processing and presentation of peptide antigen via MHC class I	2474	CDKN1A CLPB MCM7 MRPS11 CIB1 KAT5 EME2 RUVBL2 SESN1 PIM1 LONP1 MPV17 CTSD MEN1 MAP4K2 G6PD HLA-H FBXO18 GPX4 LIG1 MINK1 WNT5A NSMCE1 AEN WRNIP1 CSNK1E TERF2 DDB2 DDB1 VCAN SMO CAT CRY1 SQSTM1 BECN1 PRKDC GPS1 GPS2 THBS1 PRDX2 PAK1 PRDX5 OS9 ASTE1 ATG101 NTHL1 RPS3 SCAP CDKN2D EIF2B4 TRAP1 JUN LAMB2 MGMT INTS3 TREX1 PLK1 SSRP1 GTF2H4 MLH3 MAPK10 XAB2 DAP ERCC3 APEX1 ERCC1 STUB1 MMS19 PKN1 TNRC6A
530	0.0044066	nucleobase, nucleoside, nucleotide and nucleic acid metabolic process	6139	CARS POP5 CIB1 AHR RRP9 LSM10 RPS14 LSM11 KAT5 EME2 RUVBL2 PIM1 LONP1 BANF1 JUNB MEN1 GTF2I DDX17 G6PD FBXO18 LIG1 ENTPD4 IGFBP4 LMO4 APLP1 NSMCE1 CD3EAP WRNIP1 CSNK1E FTSJ2 PGD HCFC1 JMJD6 FEZ1 XRN2 PPIE SRSF4 SRSF5 SNRNP200 ATP6V0D1 DHX8 CNP PRKDC MAZ PRPF8 GSPT1 ATP5B DEAF1 NTHL1 ATP5D PCBP2 ASL RBM10 ICMT TGFB1 FUS INTS3 TREX1 PMM2 IGF2 SUPT5H LSM4 NFATC4 TBL3 POLA2 PPP5C LSM7 HNRNPK PPT1 MMS…
621	0.0050053	cell adhesion	7155	ITGB1 LGALS3BP SEMA5A SPON2 NRP1 PTPRU SCARB1 PTPRS B4GALT1 PODXL2 CLSTN3 PCDHGB4 CLSTN1 PCDHGB2 ATP2A2 ILK CIB1 HAPLN4 LOXL2 TMEM8A PPFIA2 PCDHGA8 POSTN TNFRSF12A PDPK1 ACTN1 APLP1 RGMB RHOB VCAN FEZ1 COL6A2 NINJ1 COL6A1 PCDHGB1 ADAM9 COL6A3 MYH9 ITGA6 MFGE8 TKT VCL VAMP3 STXBP1 AMIGO2 NRXN2 LYPD3 THY1 PCDH19 THBS2 NTN1 THBS1 SRPX2 CNR1 CDH20 CCL2 SLIT2 NR2C2AP CADM4 CADM1 LAMB2 MCAM PCDHGC3 FN1…
626	0.0050053	chromatin organization	6325	RERE CHD9 EHMT2 CHD8 PHF1 EHMT1 ARRB1 SUV420H1 KAT5 H2AFJ RUVBL2 HMG20B HIST1H1E PRKACA HIST1H2AC MEN1 KDM6B PRMT5 RING1 ACTL6B GPX4 KDM2B HIST1H2AJ PRKCA SAFB TERF2 MSL1 JMJD6 KAT2A HIST2H3A HIST2H3D HDAC3 KMT2B CXXC1 PAK1 HIST1H3A BAHD1 UBN1 HIST1H3F HIST1H3G HIST1H3I MTA2 HIST1H3D CBX6 HIST1H4K SUPT5H H1F0 HIST3H2A TADA3 PKN1 HIST1H4F
1049	0.0050053	aging	7568	JUN CDKN1A TGFB1 LRP1 ATP6AP1 GPX4 SERPINF1 GSS ILK PRKCA MIF HSD17B10 TERF2 TBX3 LOXL2 CNR1 IL1B ADRBK1 DNAJA3 TIMP3 SCAP GRB2 CALR PRKACA
554	0.019462	negative regulation of apoptosis	43066	RERE IPO13 NDUFA13 CLTB KATNB1 CLTA GRIK2 SEC61A1 C16ORF70 SNX1 AP2S1 TOM1 AKT1 STX4 SEC23B TNPO2 AP2M1 YWHAG EXPH5 AP1M1 CTSA JUN SEC13 ICMT COG7 TGFB1 SSR4 SSR2 HPS4 TAP1 TSC2 TIMM44 ARFGAP1 COPZ1 TOM1L2 MCM3AP POLA2 PACS1 HGS PICK1 KDELR2 APBA1 CALR
916	0.019462	mitochondrial genome maintenance	2	DLX1 BECN1 CDKN1A HDAC3 GSTP1 CHD8 AMIGO2 TWIST2 IFI6 ILK GRIK2 ELK1 THBS1 PRDX2 PRDX5 WNT11 SIX4 ARHGDIA PEA15 PIM1 MYO18A BDKRB2 AKT1 CCL2 MSX1 CDKN2D DFFA GSS HGF WNT5A DHCR24 MIF TBX3 PC SMO DDAH2 IL1B DNAJC5 DNAJA3 CAT PPT1 BAX TCF4 SQSTM1
143	0.019681	regulation of protein metabolic process	51246	NDUFA13 UBXN1 C2CD3 CD81 ARRB1 IFT52 CCND3 PSMD2 BDKRB2 AKT1 TIMP3 TIMP1 PRKACA TRIM21 MEN1 PDGFRB G6PD ZER1 ANAPC7 IGFBP5 PRKCE IGFBP3 HGF APLP1 WNT5A PRKCA CSNK1E MIF HGS IL1B PSME1 ERF ADAM9 ANAPC5 AURKAIP1 VPS28 RPN1 ACVR1B THBS1 PSMA7 ANAPC11 DNAJB2 PAK1 PSMB3 MKNK1 MKNK2 GPC3 INPP5K SLIT2 N4BP1 EIF2B4 JUN EGLN2 UBE2I TGFB1 NR1H2 PLK1 LIMK1 PUM1 PINK1 PSMC4 DNAJA3 STUB1 PKN1 CALR LSM14B TNRC…
445	0.019994	generation of neurons	48699	CDKN1C SPON2 NRP1 RAB3A ILK NGRN SIX4 ARHGDIA TIMP2 AKT1 PRKACA YWHAG PSD TGIF2 TNFRSF12A SERPINF1 TUBB HGF WNT5A PRKCA VCAN TUBB2B TUBB2A SMO FEZ1 S100A6 PICK1 ULK1 DBN1 DLX1 RTN1 CNP STXBP1 KATNB1 HTRA2 TULP3 THY1 NTN1 ASCL2 WNT11 SLITRK1 CNR1 MAP2 PSAP NCDN SLIT2 WNT2 FZD1 EGR2 FZD2 TGFB1 LAMB2 FZD4 STAT3 LIMK1 NR2F2 BAIAP2 DAB1 PPT1 PLXNB2 CALR MDGA1 ITM2C
351	0.02102	regulation of DNA binding	51101	JUN TGFB1 SIVA1 HGF WNT5A ARRB1 EDF1 MIF COMMD7 EDA2R PRDX2 DAP SMO APEX1 IL1B DNAJA3 CAT PIM1 RPS3 TCF4 ERC1 TRIM21 MEN1
575	0.021462	cellular protein localization	34613	RERE IPO13 PTPRU NDUFA13 CLTB CLTA GRIK2 SEC61A1 C16ORF70 TOM1 AKT1 TNPO2 AP2M1 YWHAG SEC13 COG7 SSR4 SSR2 WNT5A TAP1 TSC2 TERF2 ARFGAP1 COPZ1 TOM1L2 PACS1 HGS PICK1 KDELR2 VCL KATNB1 SNX1 WNT11 OS9 AP2S1 STX4 SEC23B EXPH5 AP1M1 CTSA JUN ICMT TGFB1 HPS4 TIMM44 MCM3AP POLA2 APBA1 CALR
419	0.022364	regulation of cell development	60284	DLX1 NRP1 B4GALT1 KATNB1 ILK THY1 NTN1 ASCL2 HOXA11 CNR1 CASP6 ARHGDIA TIMP2 AKT1 SLIT2 YWHAG BCL9L TGIF2 TGFB1 TNFRSF12A SERPINF1 IGFBP3 LIMK1 TBX3 SMO FEZ1 PLXNB2 BAX ULK1 CALR DBN1 ITM2C
216	0.022586	regulation of cellular component movement	51270	NRP1 PTPRU CD63 SCARB1 B4GALT1 ILK THY1 NTN1 THBS1 SRPX2 WNT11 RRAS AKT1 CCL2 SLIT2 AAMP PDGFRB EGFL7 TGFB1 IGFBP5 ACTN1 IGFBP3 HGF WNT5A NR2F2 ACTN4 TBX5 PC TRIP6 ADAM9 VCL
461	0.022586	negative regulation of phosphorus metabolic process	10563	CDKN1C CDKN2D JUN CDKN1A TGFB1 IGFBP3 BDKRB2 INPP5K PRKCA SLIT2 PRKACA MEN1
572	0.022586	regulation of protein kinase activity	45859	CDKN1C CDKN2D JUN CDKN1A TGFB1 IGFBP3 BDKRB2 INPP5K PRKCA SLIT2 PRKACA MEN1
740	0.022586	negative regulation of phosphate metabolic process	45936	CDKN1C CDKN1A DGKD LRP1 CERK CD81 GPS1 DGKA PRKAG1 ILK ADCY3 GPS2 MLLT1 THY1 THBS1 PRDX2 PAK1 CCND3 RGS3 PIM1 SH3BP5 AKT1 PRKACA YWHAG MEN1 HEXIM1 CDKN2D DUSP3 TGFB1 PDPK1 HGF WNT5A TSC2 PRKCA NR2F2 ADCY9 DAB1 IL1B DNAJA3 PICK1 ADAM9 PKN1 PKIG
817	0.022696	negative regulation of smooth muscle cell migration	14912	IGFBP5 IGFBP3 ILK SLIT2
399	0.023426	negative regulation of programmed cell death	43069	DLX1 BECN1 CDKN1A HDAC3 GSTP1 CHD8 AMIGO2 TWIST2 IFI6 ILK GRIK2 ELK1 THBS1 PRDX2 PRDX5 WNT11 SIX4 ARHGDIA PEA15 PIM1 MYO18A BDKRB2 AKT1 CCL2 MSX1 CDKN2D DFFA GSS HGF WNT5A DHCR24 MIF TBX3 PC SMO DDAH2 IL1B DNAJC5 DNAJA3 CAT PPT1 BAX TCF4 SQSTM1
564	0.023433	cellular macromolecule localization	70727	RERE IPO13 PTPRU NDUFA13 CLTB CLTA GRIK2 SEC61A1 C16ORF70 TOM1 AKT1 TNPO2 AP2M1 YWHAG SEC13 COG7 SSR4 SSR2 WNT5A TAP1 TSC2 TERF2 ARFGAP1 COPZ1 TOM1L2 PACS1 HGS PICK1 KDELR2 VCL KATNB1 SNX1 WNT11 OS9 AP2S1 STX4 SEC23B EXPH5 AP1M1 CTSA JUN ICMT TGFB1 HPS4 TIMM44 MCM3AP POLA2 APBA1 CALR
424	0.024034	macromolecule modification	43412	DNAJB2 EGLN2 IL1B PLK1 WNT5A GPC3 AKT1 ADAM9 STUB1 CSNK1E
551	0.024034	positive regulation of protein catabolic process	45732	TRIO CD81 EHMT1 STK19 PLOD1 ZDHHC1 SUV420H1 LOXL2 STK11 TRIM28 KAT5 RUVBL2 PIM1 CDK20 AKT1 PRKACA SBF1 TRIM21 STK32B PDK2 PDGFRB G6PD MAP2K2 COG7 ANAPC7 PRKCE IGFBP3 HGF WNT5A LMTK2 PRKCA CSNK1E FTSJ2 TRPC4AP RNF41 JMJD6 MAK ERF ADAM9 ANAPC5 ULK1 PRKD2 PRKDC RPN1 KLHL13 GSPT1 ANAPC11 PRDX2 NTHL1 MAP2 PMVK MARK4 MARK2 PLK3 UBE2I ICMT TGFB1 PMM2 PLK1 FN1 DCLK2 PPP5C CDK3 TADA3 PPT1 CDK10 MAP6D1 UBA…
91	0.025118	macromolecular complex assembly	65003	DGKD PRKAG1 ILK IL1RAP GRIK2 RPS14 TUBA1A H2AFJ PIM1 LONP1 HIST1H1E TRIM21 HIST1H2AC GTF2I PRMT5 ADSL HLA-H CPT1A DGAT1 PIH1D1 TUBB DHPS HIST1H2AJ TSC2 MIF TAPBP TUBB2B MED24 HIST2H3A NDUFS8 TUBB2A SCO2 CAT PICK1 SRSF5 SNRNP200 HIST2H3D VAMP3 SF3B3 MAZ DDX23 ARL2 HSD17B10 HIST1H3A SCUBE1 AP2S1 TSPAN4 HIST1H3F HIST1H3G STX4 ASL HIST1H3I HIST1H3D POLR2L SF3A1 TGFB1 HIST1H4K LAMB2 GSS ADRM1 GTF2H4 H…
540	0.025406	positive regulation of proteolysis	45862	DNAJB2 IFT52 IL1B PLK1 AKT1 ADAM9 STUB1 CSNK1E AURKAIP1
150	0.025805	positive regulation of cell death	10942	NRP1 CDKN1A RARG NDUFA13 TRIO B4GALT1 GRIK2 SMPD2 GRIP1 CASP6 MCF2L AKT1 PRKACA CTNNBL1 MEN1 DFFA PLEKHG2 PRKCE IGFBP3 TUBB HGF SHISA5 PRKCA AEN RNF41 ARHGEF9 IL1B PDE5A SQSTM1 PRKDC MAGED1 KATNB1 HTRA2 TEX261 ACVR1B THBS1 CNR1 PSAP RPS3 SLIT2 MARK4 JUN TGFB1 SIVA1 BAD TBX5 DAP ERCC3 DNAJA3 BAX
141	0.026214	negative regulation of JNK cascade	46329	SEMA5A NRP1 B4GALT1 CNP C2CD3 ILK TULP3 NTN1 PHB2 CACNA1G HOXA11 IFT52 WNT11 DEAF1 SUFU GPC3 SLIT2 TFAP2A TGFB1 LMO4 PTCH1 WNT5A TSC2 TBX3 KAT2A PC PDE5A
619	0.026214	nucleosome assembly	6334	DUSP3 HDAC3 AKT1 GPS2 MEN1
780	0.026214	tube morphogenesis	35239	HIST1H4K HIST1H2AJ H1F0 HIST2H3A HIST1H3A HIST3H2A H2AFJ HIST1H3F HIST1H3G HIST1H1E HIST1H3I HIST2H3D HIST1H3D HIST1H2AC HIST1H4F
624	0.027022	nucleic acid metabolic process	90304	CARS POP5 CIB1 AHR RRP9 LSM10 RPS14 LSM11 KAT5 EME2 RUVBL2 PIM1 LONP1 BANF1 JUNB MEN1 GTF2I DDX17 FBXO18 LIG1 IGFBP4 LMO4 APLP1 NSMCE1 CD3EAP WRNIP1 CSNK1E FTSJ2 HCFC1 JMJD6 FEZ1 XRN2 PPIE SRSF4 SRSF5 SNRNP200 DHX8 CNP PRKDC MAZ PRPF8 GSPT1 DEAF1 NTHL1 PCBP2 RBM10 FUS INTS3 TREX1 SUPT5H LSM4 NFATC4 TBL3 POLA2 PPP5C LSM7 HNRNPK PPT1 MMS19 AARS CALCOCO1 MCM7 CELF5 ARRB1 SMG9 DDX41 TFB1M SMG6 SNRNP7…
228	0.027136	regulation of molecular function	65009	CHRM2 SCARB1 DGKD CERK CD81 DGKA CCND3 RGS3 PSMD2 PIM1 AKT1 PRKACA TRIM21 MEN1 ANAPC7 TPM2 HGF APLP1 WNT5A NOSIP TSC2 PRKCA ACTN4 MIF POR ADCY9 SMO PSME1 ADAM9 ANAPC5 LRPAP1 TBC1D9B FICD RPN1 AGAP2 THY1 GSPT1 CACNA1G ANAPC11 PRDX2 PSAP HEXIM1 JUN TGFB1 SIVA1 PLK1 DHCR24 NR2F2 DAP DAB1 CALM3 TCF4 PKIG CDKN1C CDKN1A PRKAG1 ILK ARRB1 ECSIT EDA2R ERC1 GIT1 YWHAG CTSB DUSP3 ZER1 PDPK1 EDF1 COMMD7 ARFG…
434	0.028019	blood vessel development	1568	SEMA5A NRP1 HDAC3 B4GALT1 PTPRJ THY1 THBS1 ATP5B SRPX2 AKT1 SCAP SLIT2 AAMP WNT2 JUNB JUN EGFL7 TNFRSF12A LMO4 MMP2 FN1 NR2F2 TBX3 JMJD6 COL1A2 MYO1C SMO COL5A1 MYH9 TCF4 DHCR7 MFGE8 PLCD3
147	0.028226	lipid biosynthetic process	8610	PIGS SCARB1 CD81 PIGQ PRKAG1 PLA2G6 AGPAT2 CYB5R2 CYB5R1 SMPD2 FADS2 PMVK RNPEP MGAT3 CDIPT PSD STARD3 G6PD CHKB TPI1 DGAT1 HMGCS1 PTGES2 MBOAT7 SIGMAR1 GBF1 DHCR24 MIF PC ETNK2 LPCAT4 FASN LPCAT3 PI4KA AHRR DEGS1 PIGL DEGS2 DHCR7 PI4KB
809	0.028227	antigen processing and presentation of peptide antigen	48002	HLA-H HLA-B TAP1 CALR HLA-A HLA-F TAPBP

## Sheet: Age upregulated GO
name	adjustedPValue_msn up	description_msn up
3002	0.000411	regionalization	EDN1 PCDH8 EN1 WNT8B OVOL2 CYP26A1 NKX2-1 HOXB3 HES1 HOXD3 HOXB8 WNT1 HOXB7 HOXC8 TDGF1 HOXB6 HOXB5 NKX3-1
7389	0.00045959	pattern specification process	EDN1 PCDH8 EN1 WNT8B OVOL2 CYP26A1 FRAT1 NKX2-1 HOXB3 HES1 HOXD3 HOXB8 WNT1 HOXB7 HOXC8 LEFTY2 TDGF1 HOXB6 HOXB5 NKX3-1
9952	0.0008408	anterior/posterior pattern formation	PCDH8 EN1 CYP26A1 HOXB3 HES1 HOXD3 HOXB8 WNT1 HOXB7 HOXC8 TDGF1 HOXB6 HOXB5 NKX3-1
48598	0.0017446	embryonic morphogenesis	EDN1 GFI1 PCDH8 CHD7 EN1 WNT8B ADM OVOL2 TBX15 NAT8 NR4A3 SIX2 HOXB3 HES1 HOXD3 HOXB8 WNT1 HOXB7 TDGF1 HOXB6 HOXB5
48562	0.0017446	embryonic organ morphogenesis	EDN1 GFI1 CHD7 TBX15 NR4A3 SIX2 HOXB3 HOXD3 HOXB8 WNT1 HOXB7 HOXB6 HOXB5
48568	0.0058933	embryonic organ development	C9 ALB TLR6 TLR5
44003	0.0058933	modification by symbiont of host morphology or physiology	TBX15 SIX2 HOXB3 HOXD3 HOXB8 HOXB7 HOXB6 HOXB5
48704	0.0058933	embryonic skeletal system morphogenesis	PRSS1 MYT1L GFI1 OR4K17 IKZF3 MYLK CRHBP HOXA9 FRAT1 LIPC RGS9 SERF1A CHRNB3 UNC5C OVOL2 LCE2B LCE2C SFRP4 LMX1A COL8A2 HOXB3 PKP1 AIPL1 HOXB8 LPA HOXB7 HOXB6 HOXB5 CHODL OR1A2 ADCYAP1R1 EPB42 IL20RB TNFRSF11B VCX CACNA1E KLK7 SOHLH1 C9 APOH NKX2-1 WNT1 HOXC8 BRINP3 CNTN5 CNTN6 PGA3 CYP26A1 FGF16 NAT8 NR4A3 ID4 NMUR2 LRRN1 NMUR1 OR2A7 HOXD3 SP7 OR7C2 TDGF1 OR10J1 OR7A10 SERPINA3 SERPINA1 CHD7 STA…
32501	0.0058933	multicellular organismal process	EDN1 GFI1 CHD7 ADM OVOL2 TBX15 NR4A3 SIX2 HOXB3 HOXD3 HOXB8 WNT1 HOXB7 HOXB6 HOXB5
6952	0.0087934	defense response	SERPINA3 PGLYRP3 IL1RN SERPINA1 ITGB2 STAB2 WAS IL20RB DEFB123 GATA3 C8B LILRA2 C8A C9 CCL5 S100A14 ITGB6 CAMP ANXA3 CYP4F11 NCR2 CLEC2B VNN1 CRH TLR6 CDO1 TLR5 KLKB1
51817	0.011196	modification of morphology or physiology of other organism involved in symbiotic interaction	C9 ALB TLR6 TLR5 CAMP
21903	0.012041	rostrocaudal neural tube patterning	EN1 HES1 WNT1
30917	0.012041	midbrain-hindbrain boundary development	EN1 HES1 WNT1
51801	0.022779	cytolysis of cells in other organism involved in symbiotic interaction	BCHE IL1RN SERPINA1 ANXA3 WNT8B ADM TNFRSF11B GATA3 SLC6A1 GH1 CCL5 CDO1 CRYAB RGS9
52331	0.022779	hemolysis of cells in other organism involved in symbiotic interaction	OR10J1 VIPR2 ITGB2 ADM SLC6A1 PIK3CG CRHBP FRAT1 DEPTOR GNGT2 GRM7 GRAP2 TAGAP PDK4 RSPO3 ITGB6 CD36 RGS9 MAP3K5 EDN1 CHRNB3 TAAR8 KCNH8 FSHB GML ARAP2 IL19 TAAR2 UNC5C LAX1 GABRG2 APBB1IP SFRP4 NCR2 GREM2 CRH PKP1 LCP2 TLR6 AIPL1 GPR123 TLR5 CRYAB TRIM55 STOML3 ADCYAP1R1 CSH2 KCNA1 FGL1 IGSF1 CABP2 IL20RB WNT8B TNFRSF11B LILRA2 CACNA1E KLK7 GNA15 PDE11A CDC45 RASD1 CNR2 CCL5 NKX2-1 REPS2 HES1 S1…
23052	0.022779	signaling	SERPINA3 IL1RN SERPINA1 ITGB2 IL20RB CYP4F11 C8B C8A VNN1 C9 CCL5 CRH ITGB6 TLR6 CDO1 TLR5 KLKB1
51715	0.022779	cytolysis of cells of another organism	TBX15 SIX2 HOXB3 HOXD3 HOXB8 HOXB7 HOXB6 HOXB5
52043	0.022779	modification by symbiont of host cellular component	C9 ALB CAMP
52025	0.022779	modification by symbiont of host cell membrane	C9 ALB CAMP
9792	0.022779	embryonic development ending in birth or egg hatching	EDN1 NMUR2 NMUR1
43009	0.022779	chordate embryonic development	EDN1 PCDH8 CHD7 EN1 ADM OVOL2 TBX15 SIX2 HOXB3 HES1 HOXD3 HOXB8 WNT1 HOXB7 TDGF1 HOXB6 HOXB5 NKX3-1
1897	0.022779	cytolysis by symbiont of host cells	EDN1 PCDH8 CHD7 EN1 ADM OVOL2 TBX15 SIX2 HOXB3 HES1 HOXD3 HOXB8 WNT1 HOXB7 TDGF1 HOXB6 HOXB5 NKX3-1
19836	0.022779	hemolysis by symbiont of host erythrocytes	C9 ALB
51883	0.022779	killing of cells in other organism involved in symbiotic interaction	C9 ALB
1907	0.022779	killing by symbiont of host cells	C9 ALB
6954	0.022779	inflammatory response	C9 ALB
48706	0.022779	embryonic skeletal system development	C9 ALB
51818	0.022779	disruption of cells of other organism involved in symbiotic interaction	C9 ALB
52332	0.022779	modification by organism of cell membrane in other organism involved in symbiotic interaction	C9 ALB
44179	0.022779	hemolysis of cells in other organism	C9 ALB
48016	0.022779	inositol phosphate-mediated signaling	C9 ALB
44004	0.022779	disruption by symbiont of host cells	C9 ALB
52185	0.022779	modification of structure of other organism involved in symbiotic interaction	C9 ALB
52111	0.022779	modification by symbiont of host structure	C9 ALB
48545	0.022779	response to steroid hormone stimulus	C9 ALB
52188	0.022779	modification of cellular component in other organism involved in symbiotic interaction	C9 ALB
19835	0.026162	cytolysis	C9 GZMA C8B C8A
9611	0.026909	response to wounding	SERPINA3 IL1RN SERPINA1 ITGB2 WAS IL20RB ADM CYP4F11 C8B C8A KLK7 VNN1 C9 CCL5 APOH CRH ITGB6 CD36 TLR6 CDO1 TLR5 WNT1 KLKB1
48705	0.030145	skeletal system morphogenesis	TBX15 SIX2 HOXB3 HOXD3 HOXB8 HOXB7 HOXC8 HOXB6 HOXB5
9617	0.03732	response to bacterium	PGLYRP3 SERPINA1 ANXA3 STAB2 ADM DEFB123 CNR2 CCL5 NKX2-1 S100A14 TLR6 TLR5 CAMP
48731	0.040415	system development	MYT1L GFI1 CHD7 STAB2 ADM IKZF3 HK2 SIX2 NEFM RGS9 NKX3-1 SERF1A EDN1 ANXA3 FSHB EN1 MEPE UNC5C OVOL2 LCE2B DNM3 LCE2C LMX1A CRH COL8A2 HOXB3 HOXB8 HOXB7 CRYAB HOXB6 HOXB5 CHODL EPB42 WAS WNT8B TNFRSF11B KLK7 LCE3D SLITRK2 CNR2 SLITRK4 APOH ATOH8 NKX2-1 HES1 WNT1 HOXC8 BRINP3 LGI1 CA10 MOG LAMB3 CNTN6 IRX4 PCDH8 BMP8B APLN CYP26A1 FGF16 TBX15 NR4A3 CRYGB ID4 NMUR2 LRRN1 HOXD3 SP7 CDO1 TDGF1
9887	0.04265	organ morphogenesis	GFI1 CHD7 ADM APOH SIX2 NKX2-1 WNT1 HOXC8 NKX3-1 EDN1 ANXA3 PCDH8 OVOL2 FGF16 TBX15 NR4A3 CRYGB COL8A2 HOXB3 HOXD3 HOXB8 HOXB7 TDGF1 HOXB6 HOXB5
2237	0.046454	response to molecule of bacterial origin	SERPINA1 CNR2 CCL5 NKX2-1 ADM S100A14 TLR6 TLR5 CAMP
1501	0.046466	skeletal system development
23046	0.057815	signaling process
23060	0.057815	signal transmission
7275	0.064372	multicellular organismal development
9790	0.072518	embryonic development
48856	0.083184	anatomical structure development
7165	0.09181	signal transduction
9719	0.11441	response to endogenous stimulus
44403	0.11441	symbiosis, encompassing mutualism through parasitism
32502	0.11441	developmental process
7399	0.11441	nervous system development
9653	0.11633	anatomical structure morphogenesis
31640	0.11633	killing of cells of another organism
9725	0.12984	response to hormone stimulus
48513	0.13216	organ development
51701	0.13216	interaction with host
21532	0.13582	neural tube patterning
65008	0.13714	regulation of biological quality
50896	0.18319	response to stimulus
21915	0.19433	neural tube development
7417	0.19885	central nervous system development
23033	0.22985	signaling pathway
1906	0.23171	cell killing
48015	0.23603	phosphoinositide-mediated signaling
51707	0.23771	response to other organism
51704	0.25245	multi-organism process
6950	0.28679	response to stress
10033	0.30287	response to organic substance
19932	0.34037	second-messenger-mediated signaling
9607	0.3624	response to biotic stimulus
42221	0.39949	response to chemical stimulus
7420	0.40032	brain development
44419	0.56337	interspecies interaction between organisms
50794	0.5763	regulation of cellular process
35556	0.60618	intracellular signal transduction
65007	0.62035	biological regulation
8219	0.62644	cell death
50789	0.62978	regulation of biological process
16265	0.632	death
23034	0.7735	intracellular signaling pathway
8150	1	biological_process
9987	1	cellular process

## Sheet: GO of miR-16-5p fam targets
¬© 2000-2016 QIAGEN. All rights reserved.
Category	p-value	Molecules
Cell Death and Survival	1.68E-08-2.42E-03	RAF1,WHSC1,QKI,TGFBR3,AP2B1,KRAS,PPFIA2,PANX1,VEGFA,GATAD2A,CCND3,FBLN1,PPM1A,VAPB,HIPK2,UNG,EGLN2,WAPL,SLC9B2,UBE2Q1,CRKL,PTCH1,AGA,OTX1,TCF3,IRF1,LDOC1,LYPLA2,PSMA5,ARHGAP35,ZYX,SQSTM1,AATK,LRIG1,SNX33,INPP1,BDNF,PPT2,CTDSPL,SMURF1,PLCD1,EFNB2,MAP4,JUN,TFAP2A,IGF1,ALDH1A3,STIM1,AMER1,SORT1,VCL,RGMB,PPIF,GRB2,PLK1,MCU,CASK,DEDD,APP,MCF2L,TUBA1A,PPT1,ARHGDIA,NCOR2,GLS2,ARCN1,ADRBK1,KIF1B,SESN2,UN…
Cellular Assembly and Organization	2.75E-08-2.33E-03	RAF1,KLHDC8B,KRAS,ADGRL1,VEGFA,ATG9A,MKX,GORASP2,BAIAP2,VAPB,HIPK2,CRKL,AGA,OTX1,MYO1C,ZYX,AATK,SQSTM1,UNC13A,ARHGEF9,DMPK,SNX33,INPP1,BDNF,HEXA,SMURF1,EFNB2,MAP4,JUN,SEC61A1,TFAP2A,IGF1,STARD13,STIM1,SORT1,VCL,RGMB,SLC9A6,PPIF,GRB2,PLK1,APP,MCF2L,MINK1,TUBA1A,PPT1,ARHGDIA,CLUH,ADRBK1,SESN2,KIF1B,UNC5B,TUBB,CDK5R1,SCN4B,IKBKB,PIM1,LYNX1,MAPK3,COMT,FASN,HTRA2,CNTNAP1,FAM101B,SLITRK1,STXBP1,ACP2,WE…
Cellular Function and Maintenance	2.75E-08-2.25E-03	RAF1,AP2B1,KRAS,PANX1,VEGFA,ATG9A,GORASP2,BAIAP2,VAPB,HIPK2,SLC9B2,CRKL,PTCH1,AGA,USP19,TCF3,IRF1,LDOC1,ZYX,ARHGAP35,SQSTM1,AATK,ARHGEF9,AP2A1,DMPK,SNX33,BDNF,HEXA,ASB1,SMURF1,PLCD1,EFNB2,MAP4,SEC61A1,JUN,PTPRJ,TFAP2A,IGF1,PDE3B,STIM1,SORT1,VCL,MTMR3,RGMB,SLC9A6,PPIF,GRB2,PLK1,MCU,APP,RUBCN,MINK1,CNIH2,PPT1,ARHGDIA,NCOR2,CLUH,ADRBK1,KIF1B,SESN2,UNC5B,SLC20A2,TUBB,CDK5R1,SCN4B,SCN8A,IKBKB,PIM1,MAP…
Cell Cycle	2.15E-07-2.05E-03	RAF1,KLHDC8B,QKI,ADRBK1,MLLT6,SKI,KRAS,PCBP4,TUBB,CDK5R1,VEGFA,ESRRG,IKBKB,TBRG1,SESN1,CCND3,PIM1,FASN,MAPK3,GORASP2,HOXA10,IP6K1,PPM1A,HTRA2,HIPK2,WAPL,WEE1,PNN,CDK5RAP1,PTCH1,TCF3,ZBTB5,SSRP1,KMT2A,IRF1,SQSTM1,CYLD,LRIG1,FOXK1,SNX33,MAP4,JUN,IGF1,MKNK1,AMER1,CHUK,AGK,PPIF,GRB2,SMAD7,PLK1,APP,TUBA1A,GHR,NF1,B4GALT1,NCOR2,CLU
Cellular Growth and Proliferation	1.01E-06-2.43E-03	RAF1,WHSC1,QKI,TGFBR3,CA12,KRAS,FNDC3B,ADGRL1,FOXP2,VEGFA,ESRRG,TBRG1,SESN1,CCND3,ATG9A,FBLN1,BAIAP2,KARS,TGIF2,PPM1A,HIPK2,EGLN2,WAPL,CRKL,PTCH1,AGA,USP19,OTX1,SCAMP4,TCF3,ZBTB5,IRF1,C9orf69,ZYX,UNC13A,AATK,SQSTM1,LRIG1,FOXK1,INPP1,BDNF,HNRNPA2B1,PHC3,CTDSPL,HEXA,AFF4,ASB1,PLCD1,EFNB2,SEC61A1,JUN,PTPRJ,TFAP2A,IGF1,STARD13,STIM1,VCL,SLC9A6,DDX3Y,SPEG,PPIF,GRB2,PLK1,CASK,SCMH1,APP,MCF2L,MINK1,TUBA…
Molecular Transport	3.64E-06-1.89E-03	SFXN1,ARCN1,QKI,ADRBK1,KCNC4,SESN2,PTPN14,KIF1B,AP2B1,SLC20A2,PANX1,SLC15A4,CDK5R1,SCN8A,SCN4B,SLC13A3,IKBKB,DNAJA2,SLC25A12,CPNE1,M6PR,STXBP1,PTCH1,FBXO22,MYO1C,CACNA2D1,SNX1,LMAN2L,SQSTM1,UNC13A,ARL2,AP2A1,DMPK,BDNF,HNRNPA2B1,SMPD1,VPS4A,SLC2A3,SMURF1,PLCD1,JUN,IGF1,KCNMA1,NCS1,LY6E,STIM1,SORT1,AGK,CHUK,GOT2,SLC9A6,KLC2,DVL1,MCU,CASK,APP,CADM1,FZD4,GHR,NF1,B4GALT1,KIF5B,ABCF2,PPT1,SLC9A8,ATP6V1…
Cellular Development	2.37E-05-2.43E-03	RAF1,WHSC1,QKI,TGFBR3,KRAS,FNDC3B,PANX1,ADGRL1,FOXP2,VEGFA,ESRRG,CCND3,MKX,FBLN1,BAIAP2,TGIF2,PPM1A,VAPB,HIPK2,EGLN2,WAPL,CRKL,PTCH1,AGA,USP19,OTX1,ZBTB5,TCF3,TMEM100,IRF1,UNC13A,AATK,SQSTM1,LRIG1,FOXK1,INPP1,BDNF,HNRNPA2B1,PHC3,HEXA,CTDSPL,AFF4,ASB1,SMURF1,PLCD1,EFNB2,EXT2,JUN,PTPRJ,TFAP2A,IGF1,STARD13,LY6E,SORT1,STIM1,VCL,SLC9A6,DDX3Y,PPIF,GRB2,PLK1,DEDD,CASK,SCMH1,APP,MINK1,TUBA1A,PPT1,UBN1,AR…
Gene Expression	3.21E-05-4.24E-04	RAF1,WHSC1,QKI,MLLT6,TGFBR3,SKI,KRAS,ATXN1L,FOXP2,CDK5R1,VEGFA,ESRRG,IKBKB,GATAD2A,CCND3,MKX,PIM1,MAPK3,HOXA10,FBLN1,TGIF2,PPM1A,HIPK2,HOXC13,CPNE1,DDX54,TIA1,PTCH1,NR2C2,RTF1,OTX1,ZBTB5,TCF3,SSRP1,KMT2A,IRF1,LDOC1,ARHGAP35,LCOR,SQSTM1,BCL9L,FOXK1,BACH2,SIX4,BDNF,HNRNPA2B1,CTDSPL,ABCF1,AFF4,HDGF,JUN,SEC61A1,KMT2D,IRF2BP1,TFAP2A,IGF1,IRF2BPL,MKNK1,LRPPRC,BTAF1,CHUK,RGMB,WDTC1,DVL1,SMAD7,PLK1,CASK,…
Cell Morphology	3.42E-05-2.19E-03	RAF1,KRAS,PANX1,VEGFA,CCND3,BAIAP2,FBLN1,CRKL,AGA,USP19,TCF3,IRF1,ZYX,SQSTM1,AATK,UNC13A,ARHGEF9,DMPK,BDNF,PPT2,HNRNPA2B1,HEXA,SMURF1,PLCD1,EFNB2,MAP4,JUN,PTPRJ,IGF1,PDE3B,STARD13,STIM1,SORT1,VCL,MTMR3,RGMB,SLC9A6,PPIF,GRB2,PLK1,APP,RUBCN,MINK1,MCF2L,TUBA1A,PPT1,ARHGDIA,ADRBK1,PTPN14,SESN2,UNC5B,SKI,CDK5R1,SCN4B,IKBKB,PIM1,MAPK3,FASN,HOXA10,IP6K1,HTRA2,CNTNAP1,SLITRK1,ACP2,WEE1,NR2C2,KMT2A,ATG13,…
Nucleic Acid Metabolism	4.31E-05-4.31E-05	FASN,G6PD,SLC25A12
Small Molecule Biochemistry	4.31E-05-2.25E-03	PAFAH1B2,NAPEPLD,QKI,ADRBK1,BDNF,UNC5B,HEXA,SMPD1,PLCD1,VEGFA,IKBKB,IGF1,FASN,NCS1,AGK,SLC25A12,PI4KB,MTMR3,PAFAH2,G6PD,ETNK1,PISD,APP,LYPLA2,B4GALT1,PPT1
Cell-To-Cell Signaling and Interaction	4.58E-05-1.64E-03	RAF1,AP2A1,WHSC1,BDNF,TGFBR3,KRAS,PANX1,CDK5R1,VEGFA,IKBKB,EFNB2,PTPRJ,KCNMA1,MAPK3,BAIAP2,NSMF,CHUK,VCL,CNTNAP1,HIPK2,KLC2,SMAD7,IRF1,APP,NF1,PPT1,LRRC7,ZYX,UNC13A,ARHGEF9,CLU
Cell Signaling	5.05E-05-1.41E-03	RAF1,ABI2,GRB2,CRKL,KRAS,MCF2L,GHR,IGF1,NF1,BAIAP2,ARHGAP35,ARHGDIA,CHUK,CRIM1,ARHGEF9
Carbohydrate Metabolism	8.44E-05-1.92E-03	PAFAH1B2,AP2A1,ADRBK1,SESN2,BDNF,UNC5B,HEXA,KRAS,AFF4,SLC2A3,CDK5R1,PLCD1,ESRRG,IKBKB,EXT2,CCND3,IGF1,PDE3B,NCS1,IP6K1,SORT1,AGK,PI4KB,MTMR3,WDTC1,PAFAH2,GRB2,G6PD,ETNK1,PISD,DSEL,APP,LYPLA2,HECTD4,B4GALT1,TPI1
Lipid Metabolism	8.44E-05-2.25E-03	PAFAH1B2,NAPEPLD,QKI,ADRBK1,BDNF,UNC5B,HEXA,SMPD1,PLCD1,VEGFA,IKBKB,IGF1,FASN,NCS1,AGK,PI4KB,MTMR3,PAFAH2,G6PD,ETNK1,PISD,APP,LYPLA2,B4GALT1,PPT1
Cellular Movement	1.65E-04-1.58E-03	RAF1,WHSC1,ADRBK1,PTPN14,TGFBR3,SKI,UNC5B,HARS,KRAS,FNDC3B,TUBB,CDK5R1,SCN8A,VEGFA,IKBKB,ATG9A,PIM1,MAPK3,FASN,FBLN1,KARS,NAV1,PPM1A,HIPK2,RNF41,CRKL,NR2C2,MYO1C,TCF3,KMT2A,SPON2,ZYX,ARHGAP35,SQSTM1,CYLD,LRIG1,MAK,BACH2,SIX4,BDNF,PPT2,HNRNPA2B1,SMPD1,HDGF,SMURF1,PLCD1,EFNB2,JUN,IGF1,TFAP2A,PTPRJ,KMT2D,KCNMA1,STARD13,ABHD2,PLXNB1,SORT1,STIM1,VCL,AGK,CHUK,PI4KB,PPIF,GRB2,G6PD,SMAD7,GIT1,CADM1,APP,M…
Cellular Compromise	2.33E-04-2.44E-03	ADRBK1,KIF1B,BDNF,PTPN14,UNC5B,SMPD1,TUBB,PANX1,VEGFA,JUN,IGF1,KCNMA1,LYNX1,MAPK3,GORASP2,PLXNB1,VAPB,UNG,RGMB,STXBP1,SPEG,DVL1,AGA,PLK1,OTX1,GIT1,IRF1,APP,CADM1,GHR,PPT1,ARHGDIA,CLU
Post-Translational Modification	4.37E-04-4.37E-04	RAF1,DMPK,ADRBK1,SESN2,PTPN14,CTDSPL,KRAS,CDK5R1,VEGFA,EFNB2,IKBKB,IGF1,PTPRJ,CCND3,PIM1,MAPK3,FBLN1,MKNK1,CHUK,HIPK2,WEE1,DVL1,PLK1,APP,MINK1,GHR,PGM2L1,SQSTM1,AATK,MAK
DNA Replication, Recombination, and Repair	8.35E-04-8.35E-04	KLHDC8B,PIM1,KIF5B,KRAS,PLK1
Protein Trafficking	1.2E-03-1.2E-03	M6PR,AP2A1,KLC2,ARCN1,PTPN14,KIF1B,CASK,SMURF1,JUN,PPT1,SNX1,SORT1,DNAJA2,LMAN2L,SQSTM1

## Sheet: GO of miR-10a targets
¬© 2000-2016 QIAGEN. All rights reserved.
Category	p-value	Molecules
Gene Expression	6.98E-08-5.95E-03	ANK3,RNF8,BACH2,NFIX,ITSN1,SIX4,MLLT6,BDNF,USF2,NR2F2,CTDSPL,CRK,BCL6,HNRNPK,ESRRG,GATAD2A,SUFU,NEK6,CREB1,PRKCE,NACC1,IL1RAP,TBX5,PATL1,SAP18,NR2C2,STAT3,CASK,OTX1,BEND3,HAS3,FUS,PRKACA,PEA15,DVL3,LCOR,NCOR2,MAP4K4,UBE2I
Cell Death and Survival	8.19E-07-8.15E-03	ANKS1B,PNO1,RNF8,CAMLG,ITSN1,BCL6,SRSF1,GATAD2A,SUFU,NEK6,M6PR,TBX5,SAP18,WAPL,CNP,DPF2,NR2C2,OTX1,STAT3,HAS3,FUS,BAP1,PRKACA,CTSB,TFRC,DUS2,UBE2I,ANK3,BACH2,NFIX,SIX4,BDNF,CTDSPL,CRK,HNRNPK,SMURF1,SCARB2,SUSD6,CREB1,PRKCE,NACC1,NEDD4,CNTFR,APAF1,CASK,CNNM4,LTBP1,NF1,PEA15,NCOR2,TWSG1,MAP4K4,BCL2L11
Cellular Development	1.17E-06-7.95E-03	ITSN1,MLLT6,ELAVL3,BCL6,ADGRL1,SRSF1,ESRRG,SUFU,IL1RAP,TBX5,CNP,NR2C2,TSPAN33,OTX1,STAT3,HAS3,FUS,ITPKC,PRKACA,CTSB,TFRC,ACTG1,FNBP1L,UBE2I,ANK3,BACH2,NFIX,SIX4,BDNF,CTDSPL,CRK,HNRNPK,FXR2,SMURF1,CREB1,STARD13,PRKCE,ARHGEF12,CNTFR,FAM57B,APAF1,LTBP1,NF1,ATCAY,DVL3,TWSG1,NCOR2,MAP4K4,BCL2L11
Cellular Growth and Proliferation	1.05E-04-7.11E-03	RNF8,ITSN1,MLLT6,NR2F2,BCL6,ADGRL1,SRSF1,ESRRG,SUFU,NEK6,IL1RAP,TBX5,WAPL,CNP,NR2C2,TSPAN33,STAT3,OTX1,HAS3,FUS,ITPKC,CTSB,BAP1,PRKACA,TFRC,ACTG1,DUS2,FNBP1L,UBE2I,ANK3,BACH2,NFIX,SIX4,BDNF,USF2,CTDSPL,CRK,HNRNPK,FXR2,CREB1,STARD13,PRKCE,NACC1,KLC2,ARHGEF12,CNTFR,APAF1,CASK,LTBP1,NF1,PEA15,ATCAY,DVL3,TWSG1,NCOR2,MAP4K4,BCL2L11
Cell Morphology	3.05E-04-7.11E-03	ANK3,NFIX,ITSN1,BDNF,STARD3,CNP,CRK,STAT3,HNRNPK,SMURF1,SCARB2,SRSF1,NF1,STARD13,CREB1,PRKCE,ATCAY,DVL3,IL1RAP,BCL2L11,FNBP1L,UBE2I,MTMR3
Cellular Assembly and Organization	3.05E-04-7.11E-03	ANK3,NFIX,ITSN1,BDNF,SIX4,CRK,BCL6,ADGRL1,HNRNPK,SMURF1,ESRRG,STARD13,CREB1,NEK6,PRKCE,IL1RAP,MTMR3,TBX5,ARHGEF12,STARD3,CNP,CASK,STAT3,ARPC1A,NF1,PRKACA,DVL3,ATCAY,ACTG1,BCL2L11,FNBP1L,UBE2I
Cellular Function and Maintenance	3.05E-04-7.11E-03	ANK3,CAMLG,NFIX,ITSN1,BDNF,SIX4,CRK,BCL6,ADGRL1,HNRNPK,SMURF1,ESRRG,STARD13,CREB1,NEK6,PRKCE,IL1RAP,TBX5,ARHGEF12,CNP,STAT3,LTBP1,ARPC1A,NF1,PRKACA,ATCAY,ACTG1,FNBP1L,BCL2L11,UBE2I
Cell-To-Cell Signaling and Interaction	4.84E-04-6.85E-03	ANK3,ANKS1B,KLC2,BACH2,ITSN1,BDNF,SIX4,CNP,CRK,CASK,ST6GALNAC6,STAT3,BCL6,ADGRL1,HAS3,HNRNPK,NF1,CREB1,PRKACA,IL1RAP,BCL2L11
Cellular Movement	5.19E-04-7.81E-03	ANK3,NEDD4,NFIX,BDNF,NR2C2,CRK,STAT3,HAS3,SRSF1,NF1,CREB1,CTSB,TFRC,PRKCE,MAP4K4,FNBP1L
Protein Synthesis	5.19E-04-5.62E-03	PATL1,NEDD4,RNF8,BDNF,APAF1,FBXO22,MAN1A2,CRK,ST6GALNAC6,STAT3,HNRNPK,SUFU,TRPC4AP,CREB1,CNPY3,CTSB,PRKCE,DVL3,DUS2,BCL2L11,UBE2I
Cellular Compromise	1.21E-03-5.95E-03	SCARB2,ANK3,BDNF,CNP,CREB1,CTSB,STAT3
Molecular Transport	1.86E-03-6.44E-03	ANK3,BDNF,USF2,BCL6,SEC14L1,SMURF1,CREB1,PRKCE,M6PR,KLC2,NEDD4,STARD3,CNTFR,CNP,FBXO22,CASK,STAT3,CNNM4,HAS3,PANK1,FUS,NF1,PRKACA,PEA15,TFRC,MAP4K4,BCL2L11,UBE2I
Cell Cycle	2.23E-03-5.95E-03	RNF8,ITSN1,BAP1,PEA15,APAF1,PRKCE,NCOR2,STAT3,BCL6
Drug Metabolism	2.62E-03-6.22E-03	CNP,PRKACA,STAT3,HAS3,BCL2L11
Carbohydrate Metabolism	3.05E-03-7.92E-03	PANK1,SCARB2,BDNF,USF2,CREB1,APAF1,NR2C2,STAT3,HAS3,MTMR3
Small Molecule Biochemistry	3.05E-03-6.22E-03	M6PR,BDNF,STARD3,CREB1,CNP,APAF1,PRKACA,STAT3,ST6GALNAC6,HAS3,SEC14L1
Cell Signaling	4.24E-03-4.24E-03	NEK6,PRKACA,PRKCE,MAP4K4
RNA Post-Transcriptional Modification	4.37E-03-5.28E-03	SRSF1,SAP18,FUS,DBR1,HNRNPK
Lipid Metabolism	5.5E-03-5.95E-03	M6PR,BDNF,STARD3,CREB1,ST6GALNAC6
Amino Acid Metabolism	5.95E-03-5.95E-03	BDNF
DNA Replication, Recombination, and Repair	5.95E-03-6.22E-03	RNF8,FUS,PEA15,APAF1,UBE2I
Nucleic Acid Metabolism	5.95E-03-5.95E-03	APAF1,STAT3
Post-Translational Modification	5.95E-03-5.95E-03	RNF8,ST6GALNAC6
Protein Trafficking	6.44E-03-6.44E-03	M6PR,NEDD4,KLC2,STAT3,CASK,BCL6,SMURF1
