# Supplementary material for: Maintenance of age in human neurons generated by microRNA-based neuronal conversion of fibroblasts
Source: eLife journal article supplement (doi:10.7554/elife.18648), 2016-09-20
Supplement: supp [file elife-18648-supp-v1.zip › elife_poa_e18648_Figure_4_source_data_1.xlsx]

## Sheet: Mitosox
Young NEURONS	mitosox +	mitosox -
3D 9124	25.8	73.2
01 9124	27.2	71.9
01 9124	39.1	58.5
5M 9124	23.2	72.8
02 9124	13.6	81.2
01 9124	13.9	86.1
01 9124	15.8	84.2
01 9124	16.8	83.2
OLD NEURONS	mitosox +	mitosox -
86 9124	43.5	53.6
90 9124	50.8	44.2
91 9124	72.7	26.4
92A 9124	56.6	36.2
92B 9124	56.5	39.7
91 9124	63.7	29.5
91 9124	33.2	66.8
91 9124	29	71
Young Fibroblasts	mitosox +
1	31.5
1	16.9
2	27.8
Old Fibroblasts	mitosox +
91	79.9
72	62.6
74	78
94	65.6

## Sheet: Comet Assay
Reprogrammed neurons
92A	91		3D	1			5M	92B
269	324		197	217			79	280
263	306		247	171			165	370
229	354		221	206			109	329
535	263		190	164			193	395
266	226		177	188			168	361
303	248		169	141			178	375
359	265		197	170			231	280
303	375		190	135			212	347
284	266		225	222			198	342
264	278		224	169			201	363
256	325		167	179			232	396
263	288		203	143			221	406
252	274		296	212			235	354
262	270		288	165			241	447
288	309		244	211			228	394
250	260		210	243			261	353
250	330		208	179			200	333
343	277		276	195			204	396
268	352		200	223			271	409
268	383		201	228			297	367
390	280		263	214			269	427
271	371		186	204			251	314
371	260		200	198			200	351
262	316		176	193			248	339
272	292		264	258			296	378
403	265		214	208			192	392
371	345		200	263			226	303
300	272		260	205			184	343
223	304		215	198			174	300
280	396		246	282			194	297
258	314		242	213			215	297
269	286		224	269			164	379
261	348		277	199			119	360
247	290		217	257			170	415
241	276		270	198			132	349
284	306		199	211			252	307
237	279		207	159			212	306
232	327		263	183			215	355
265	384		234	139			224	322
277			297	195			232	361
260			223	208			249	413
270			341	174			288	298
499			225	264			187	379
284			296	204			150	397
324			260	334			273	309
272			254	200			186	379
322			203	173			209	317
342			214	154			203	341
255			236	208			206	379
254			246	173			200	448
271			214	221			297	353
324			348	204			300	341
565			269	203			272	337
250			234	243			268	342
306			222	209			223	465
286			238	211			251	275
211			242	181			293	379
349			114	186			176	382
366			135	179			184	341
274			206	198			240	350
248			221	168			215	358
316			212	191			153	349
253			241	250			131	299
274			139	189			119	289
253			161	154			154	324
240			198	155			220	283
259			206	190			188	381
214			215	256			159	285
264			138	166			197	345
280			167	188			156	306
316			159	209			109	318
260			203	176			212	290
236			197	188			153	289
277			195	245			204	370
263			218	209			187	367
243			214	195			173	198
330			135	210			124	351
263			236	196			162	283
247			200	179			169	370
242			177	230			182	271
317			167	186			83	409
222			197	208			135	350
247			209	116			167	323
253			231	184			140	321
278			234	196			146	401
			170	207			158	344
			201	224			97	321
			212	231			128	402
			205	205			140	345
			206	187			148	307
				222			163	371
				208			165	392
				216			131	257
				223			252	303
				183			230	333
				186			245	364
				209			230	323
				206			246	341
				168			270	363
				163			232	387
							212	391
								358
								335
286.682	304.718		217.422	200.06			198.347	347.436
61.9933	42.3046		41.9127	33.3869			51.204	44.7035
Fibroblasts
5M	1	12	72	86	92B
143	231	132	301	313	304
128	258	139	319	357	343
150	231	124	324	296	315
234	268	198	299	294	296
107	265	148	343	380	330
154	199	144	256	377	333
182	122	114	267	395	343
290	259	169	265	346	324
246	236	242	253	383	327
252	228	84.8	263	349	309
200	224	85.8	259	396	374
244	205	137	275	335	323
290	232	124	312	286	294
247	156	132	279	339	314
246	123	157	237	318	307
213	172	198	198	285	312
271	140	226	236	303	294
357	171	210	274	296	212
285	190	155	187	294	274
253	147	250	250	333	352
328	159	263	238	330	339
238	91.9	221	198	328	303
289	124	229	492	356	309
303	148	210	252	332	314
232	125	203	191	310	302
294	123	223	243	381	331
275	256	249	267	278	366
278	241	271	282	314	389
204	272	222	247	306	329
246	236	304	242	298	366
189	256	230	265	274	380
229	248	190	282	311	352
296	240	251	293	332	388
245	217	223	223	280	344
252	261	292	208	259	353
236	257	266	204	305	352
217	217	257	358	355	341
211	315	259		287	344
212	228	253		310	315
132	240			402	374
249	215			347	348
215	221			365	379
146	248			387	336
141	263			336	399
110	291			338	285
206	269				305
	205				285
	248				312
	139				344
	310				379
	312				337
	181				307
	253				337
	226				291
					348
					282
227.5	216.535	199.631	267.081	328.8	329.375
58.5308	54.6095	58.2726	55.9088	37.0366	34.2167
