# Supplementary figures and images for: Maintenance of age in human neurons generated by microRNA-based neuronal conversion of fibroblasts
Source: eLife journal article supplement (doi:10.7554/elife.18648), 2016-09-20

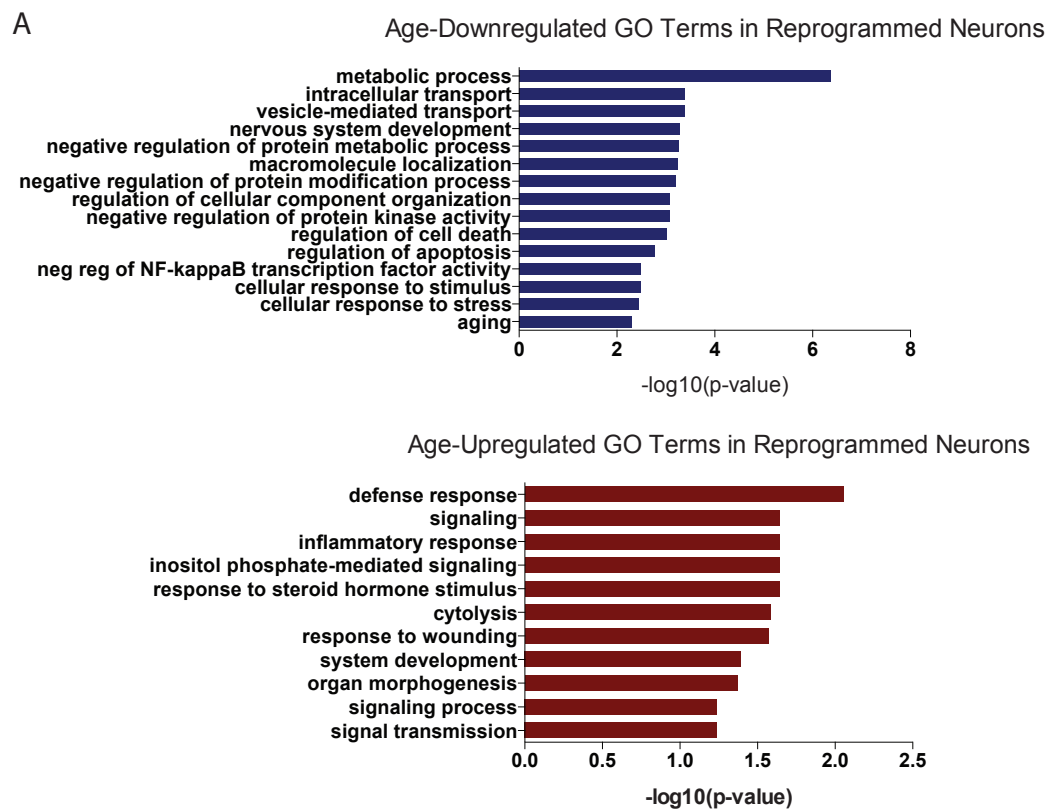

Figure 3 - Supplement 1

Supplement: supp [file elife-18648-supp-v1.zip › elife_poa_e18648_Figure_3_figure_supplement_1.pdf]

A

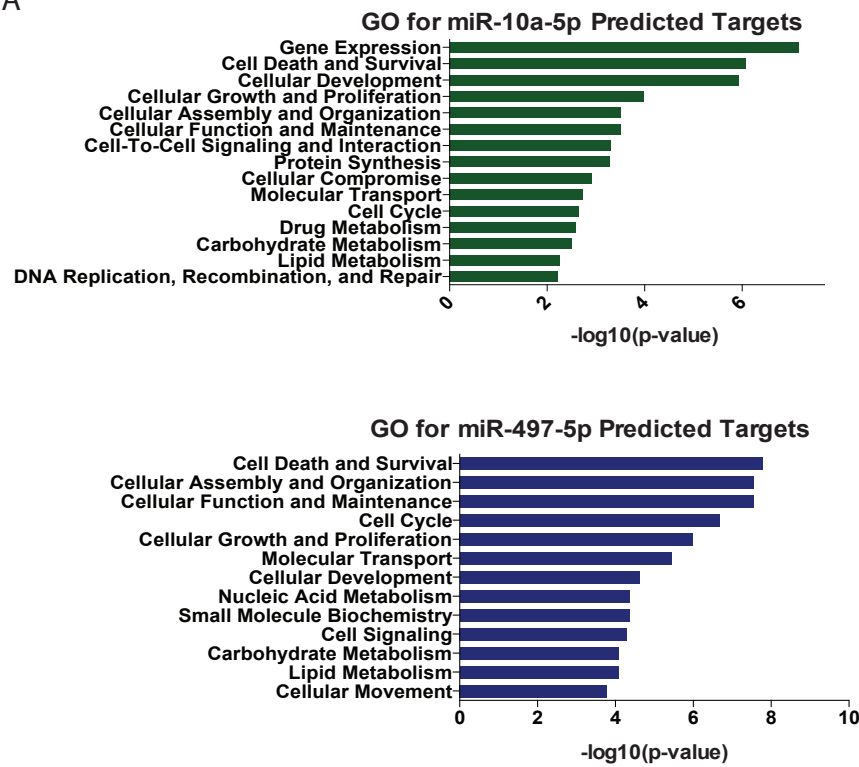

Figure 3 - Supplement 2

Supplement: supp [file elife-18648-supp-v1.zip › elife_poa_e18648_Figure_3_figure_supplement_2.pdf]

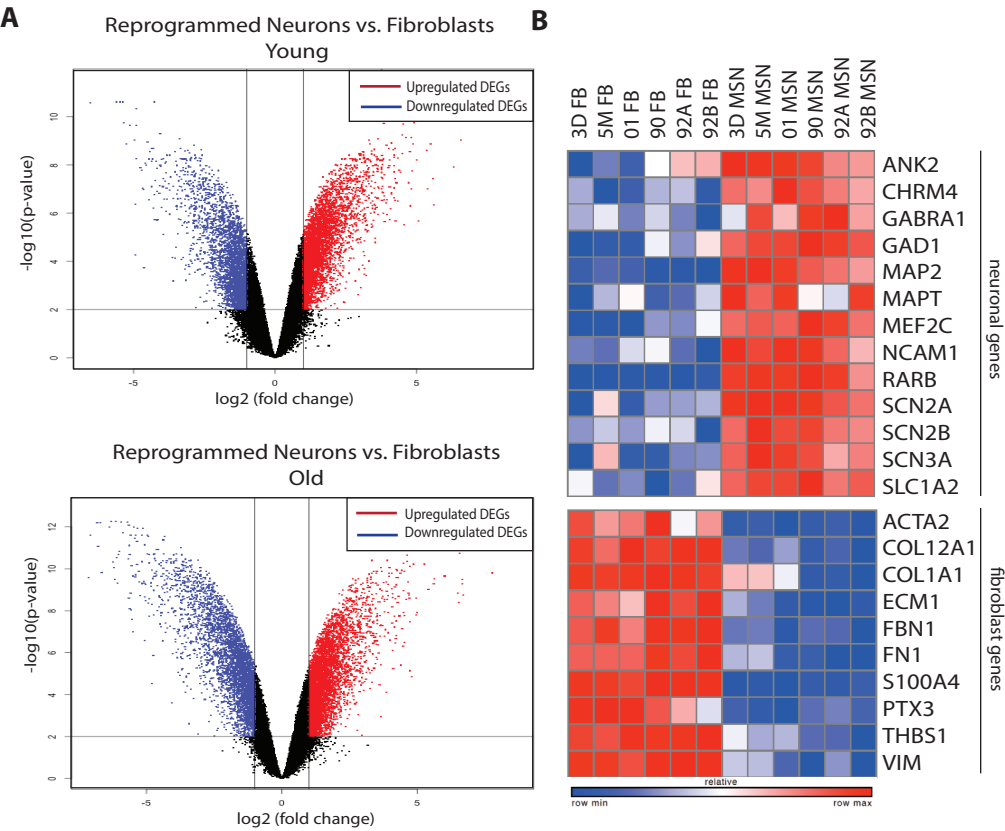

Figure 1 - Supplement 1

Supplement: supp [file elife-18648-supp-v1.zip › elife_poa_e18648_Figure_1_figure_supplement_1.pdf]
